# Supplementary material
Source: PubMed Central journal article supplement (PMC10083187)
Supplement: NIHMS1865889-supplement-Supplement.pdf [file NIHMS1865889-supplement-Supplement.pdf]

# Contents

|                                  |     |
|----------------------------------|-----|
| <b>Supplementary notes</b> ..... | 2-4 |
|----------------------------------|-----|

## Supplementary figures

|                                                                                                                                                                                                                                                                                                                                                                                                                                                                                                                                             |       |
|---------------------------------------------------------------------------------------------------------------------------------------------------------------------------------------------------------------------------------------------------------------------------------------------------------------------------------------------------------------------------------------------------------------------------------------------------------------------------------------------------------------------------------------------|-------|
| S Figure 1-9: Region mirror Manhattan plots for 14 local regions across 14 phenotypes with significant local genetic correlations with IPF tested using SUPERGNOVA (FDR < 0.05). P values from IPF GWAS summary statistics are plotted on the top, and P values for the SNPs located within the significant SUPERGNOVA region are highlighted in blue. P values from another trait's summary statistics are plotted on the bottom, and P values for the SNPs located within the significant SUPERGNOVA region is highlighted in yellow..... | 5-13  |
| S Figure 10-12: Locus zoom plot for genome regions of 1Mb around genes identified by TWAS. The identified gene is highlighted within the red box.....                                                                                                                                                                                                                                                                                                                                                                                       | 14-16 |

## Supplementary tables

|                                                                                                                |       |
|----------------------------------------------------------------------------------------------------------------|-------|
| S Table 1: Global genetic correlations .....                                                                   | 17    |
| S Table 2: Significant local regions from SUPERGNOVA .....                                                     | 18    |
| S Table 3: Candidate genes from SUPERGNOVA.....                                                                | 19    |
| S Table 4: TWAS UTMOST results .....                                                                           | 20    |
| S Table 5: Candidate genes from TWAS UTMOST.....                                                               | 21    |
| S Table 6: <i>MAFK</i> and <i>SMAD2</i> target gene set from CHIP-Atlas .....                                  | 22    |
| S Table 7: Partitioned heritability enrichment analysis of <i>MAFK</i> TF binding sites in IPF after MTAG..... | 23    |
| S Table 8A: Enrichment analysis of <i>MAFK</i> targets .....                                                   | 24-28 |
| S Table 8B: Enrichment analysis of <i>SMAD2</i> targets .....                                                  | 29-32 |
| S Table 9: GWAS study information .....                                                                        | 33    |
| S Table 10A: Sensitivity analysis of local gene mapping using different clumping parameters.....               | 34    |
| S Table 10B: Sensitivity analysis of local gene mapping using GWASs colocalization.....                        | 34    |

|                         |    |
|-------------------------|----|
| <b>References</b> ..... | 35 |
|-------------------------|----|

## Supplementary notes

### GNOVA and genetic correlation estimation

The genetic correlation is the correlation between the genetic effects of a group of single nucleotide polymorphisms (SNPs) on two complex traits. GNOVA assumes two studies share the same list of SNPs; and assume two standardized traits  $Y_1$  and  $Y_2$  follow the linear models  $Y = \sum X_i \beta_i + \varepsilon$ . Here  $X_i$  is the genotype of SNP  $i$ , and  $\beta_i$  is the genetic effects. GNOVA uses the method of moments to estimate  $cov(\beta_{i1}, \beta_{i2})$ , which is the genetic covariance between genetic effects on two traits, and used block-wise jackknife to estimate the variance to derive the test statistics for the genetic covariance.

### Selection criteria of GWAS summary statistics used for genetic correlation

To explore the genetic correlation between IPF and a wide range of phenotypes, we first downloaded all GWAS summary statistics released from the second round GWAS analysis results of the UK Biobank. We used the transformed version for phenotypes measured as continuous variables (phenotype values have been inverse rank normalized) instead of the raw version. Details of the UK Biobank GWAS data can be found in <http://www.nealelab.is/uk-biobank>. However, we found that some complex traits require additional curation of the definitions. They might correspond to multiple phenotype items in the UK Biobank with a limited sample size. For example, lung cancer corresponded to Data field 22140: Doctor diagnosed lung cancer (not mesothelioma) and Data-Field 20001: Self-reported lung cancer. Their case numbers are 156 and 478, respectively. Either of the GWAS summary statistics has enough power and is not equal to lung cancer's general definition. Therefore, in addition to UK Biobank GWAS data, we downloaded additional GWAS data for 31 traits. We selected these 31 traits because 1) they were important diseases or traits that researchers are interested in, 2) they have large sample sizes (all of the GWASs have sample sizes > 10,000) to ensure the power of downstream analysis, 3) They are publicly available. The selection criteria for the 31 traits were that 1) having a large sample size GWAS study, 2) having identified genome-wide significant locus in previous GWASs, 3) representing different disease types (neuro & psychiatric, immune, cancer, metabolic ) to minimize bias.

### SUPERGNOVA and local genetic correlation estimation

The local genetic correlation can be treated as an extension of the genetic correlation. The only difference is that SUPERGNOVA assumes the whole genome can be partitioned into  $I$  independent regions. Then it assumes two standardized traits  $Y_1$  and  $Y_2$  follow the linear models  $Y = \sum_{i=1}^I X_i \beta_i + \varepsilon$ , where  $X_i$  are the genotypes and  $\beta_i$  is the effect size of SNPs in region  $i$ . SUPERGNOVA can estimate variance-covariance matrix  $cov(\beta_{i1}, \beta_{i2})$  for each local region. For genetic correlation, all SNPs have the same variance-covariance matrix. For local genetic correlation, SNPs in the same local region have the same variance-covariance matrix, but different local regions can have different variance-covariance matrices. The authors of the original SUPERGNOVA paper demonstrated that SUPERGNOVA could provide unbiased estimates for UKBB data using genotype data from the 1000 genome project as its reference panel in simulations. Furthermore, to reduce bias due to linkage disequilibrium and allele frequencies, we cleaned the GWAS data before calculating the genetic correlation and only kept SNPs with MAF greater than 0.01. We cut the local region based on LD when calculating the local genetic correlation so that each region is relatively independent. SUPERGNOVA considers LD in the model when calculating the correlation of the local region. As a result, we believe that both factors had very little effect on the results of local genetic correlation.

### Local region proportion estimation

To quantify the degree of local correlation, we estimated the proportion of correlated regions with the R package `ashr`[29]. The inputs were estimates of local genetic covariance and their standard errors. The unimodal prior distribution was set to be “halfnormal” for all the results of pairs of traits. The method applied a Bayesian framework to compute FDR for each genomic region. To estimate the number of correlated regions for each pair of traits, we calculated the sum of  $(1 - \text{FDR})$  given by `ashr` for each region.

## Manhattan plots and gene mapping for local regions

The overall aim is to find local regions with genetic correlation and then locate genes contributing to the local correlation. For local regions, we first removed regions with SNPs  $\leq 250$  to ensure the approximation in the methodology was valid. With the number of SNPs too small, SUPERGENOVA cannot give accurate estimates for p-value and will result in issues such as type-I error inflation. 250 is an empirical number that works well in simulation. We obtained regions with significant local genetic correlation and controlled the FDR $<0.05$ . That means for these local regions, the correlation of SNP's effects on two traits is significant, although the SNPs may not be genome-wide significant. To prioritize genes with potential pleiotropic effects on IPF and the other traits on local regions, we first clumped the SNPs in the significantly correlated regions using PLINK's genome analysis (URLs) genome analysis. We set the significance threshold for index SNPs as 0.001 and 0.01, linkage disequilibrium (LD) threshold for clumping as 0.2, and the physical distance threshold for clumping as 250 kb for all regions. After clumping, the variant with the lowest p-value in each region was defined as the sentinel variant. Next, the sentinel variants were mapped to the gene or the nearest gene. We do not use the p-value cutoff for global GWAS tests because we looked into the region specifically to pick SNPs whose p-value is small compared to the background SNPs. So, we used  $p = 0.01$  and  $0.001$ . A P-value around 0.001 is commonly used for the replication analysis of GWAS signals.

In addition, we plotted the Manhattan plots for local regions. For the Manhattan plot, the x-axis is the ordered location on the genome, and the y axis is  $-\log_{10}(\text{p-value})$ , as shown in the Supplemental figures. We can see clear signals from the background for both traits using the above thresholds.

We performed two sensitivity analyses to demonstrate the robustness of gene mapping for local regions: 1) clumping with varying parameter combinations and 2) colocalization analysis of two GWASs.

For the first one, we tried six different combinations of significance level thresholds ( $p=0.01$  and  $0.05$ ;  $p=0.001$  and  $0.01$ ;  $p=0.001$  and  $0.05$ ;  $p=0.0001$  and  $0.001$ ;  $p=0.0001$  and  $0.005$ ;  $p=0.0001$  and  $0.01$ ). We tried all combinations of LD thresholds equal to 0.3, 0.2, and 0.1 and distance thresholds equal to 100 kb, 250 kb, and 500 kb (9 combinations for each threshold combination) for each threshold combination. As the results, for each local region, we tried a total of 54 parameter combinations. We ran the above analysis for each parameter setting and counted the frequency of each mapped gene. **S Table 10A** shows the results of all reported local genes in our manuscript. The number is the count of leading SNPs being mapped to the gene. The number in the middle of the parentheses represents the rank of the count among shared mapped genes. For example, for both IPF and hip circumference, four genes, *ANAPC10*, *HHIP*, *OTUD4*, and *SLC10A7*, were identified. They were mapped for IPF 60, 26, 3, 9 times, respectively. For hip circumference, they were mapped for 99, 30, 48, 47 times. *ANAPC10* thus ranks first in both IPF and hip circumference. It should be noted that multiple leading SNPs in the local region can be assigned to the same gene. Each gene can have more than 54 counts. From the result, the ranks of the manuscript-reported genes are always ranked first, indicating the consistency and robustness of the clumping results. Furthermore, the gene rank is consistent between IPF and the other trait, indicating that the signal is indeed shared by both traits.

For the second, we used `mcloc`[35] to compute the posterior probabilities of all possible colocalization configurations. In our case, we have noncausal SNPs, one causal SNP for one GWAS, two different causal SNPs for two GWASs, and a common causal SNP for both GWASs. **S Table 10B** summarizes the `mcloc` results. According to the results, the mapped genes from our manuscript and the mapped genes from `mcloc` are highly consistent.

### UTMOST for gene-based association test

UTMOST has a pre-trained cross-tissue gene expression imputation model using genotype and normalized gene expression data from 44 tissues in the GTEx project. The cross-tissue gene expression imputation can be formulated as  $Y_i = X_i B_i + \varepsilon_i$ , where  $Y_i$  is the expression data and  $X_i$  is the genotype data from the same individual. For gene-association test, UTMOST combines GWAS summary statistics and SNP effects estimated in cross-tissue imputations model ( $\hat{B}$ ) to quantify gene-trait associations in each tissue. For a gene in the  $i^{\text{th}}$  tissue, UTMOST models the relationship:  $T = a_i + E_i \gamma_i + \varepsilon_i$ . Here  $T$  is the phenotype,  $E_i$  is the imputed expression ( $E_i = X_i \hat{B}_i$ ) and then tests for the coefficient  $\gamma_i$ .

### Single cell differential expression analysis

We obtained the count data from lung single-cell RNA-seq data for IPF and control samples. The data provider processed the single-cell RNA-seq data with quality control, filtering, and cell type labeling. To obtain cell-type-specific differentially expressed genes (DEGs), we subtracted cells for each cell type and then applied the hurdle model to test for DEGs using functions from the MAST R package. We investigated the difference in the proportions of cells that express candidate genes between IPF samples and healthy samples using the two-proportions z-test. The proportion is the number of cells expressing the gene over the total number of cells in IPF and control samples, respectively. So IPF (%) = (number of IPF cells expressing the gene / number of IPF cells) and Control (%) = (number of control cells expressing the gene / number of control cells).

### MTAG for multi-trait GWAS analysis

MTAG enables joint analysis of two traits to boost statistical power of IPF GWAS. MTAG is a generalization of inverse-variance-weighted meta-analysis. For SNP  $j$ , we denote the vector of marginal true effects on each of the  $T$  traits by  $\beta_j$ . MTAG assumes  $E(\beta_j) = 0$  and  $\text{var}(\beta_j) = \Omega$ , which is homogeneous across SNPs. The vector of GWAS estimates of the effects for SNP  $j$  is  $\hat{\beta}_j$  with  $E(\hat{\beta}_j | \beta_j) = 0$  and  $\text{var}(\hat{\beta}_j | \beta_j) = \Sigma_j$ . The MTAG estimator is a weighted sum of the GWAS estimates and can be written as  $\hat{\beta}_{j,MTAG} = w \hat{\beta}_j$ , where  $w$  is a function of  $\Omega$  and  $\Sigma_j$ .

**S Figure 1. The mirror Manhattan plot of GWAS signals for IPF and the locally correlated trait.**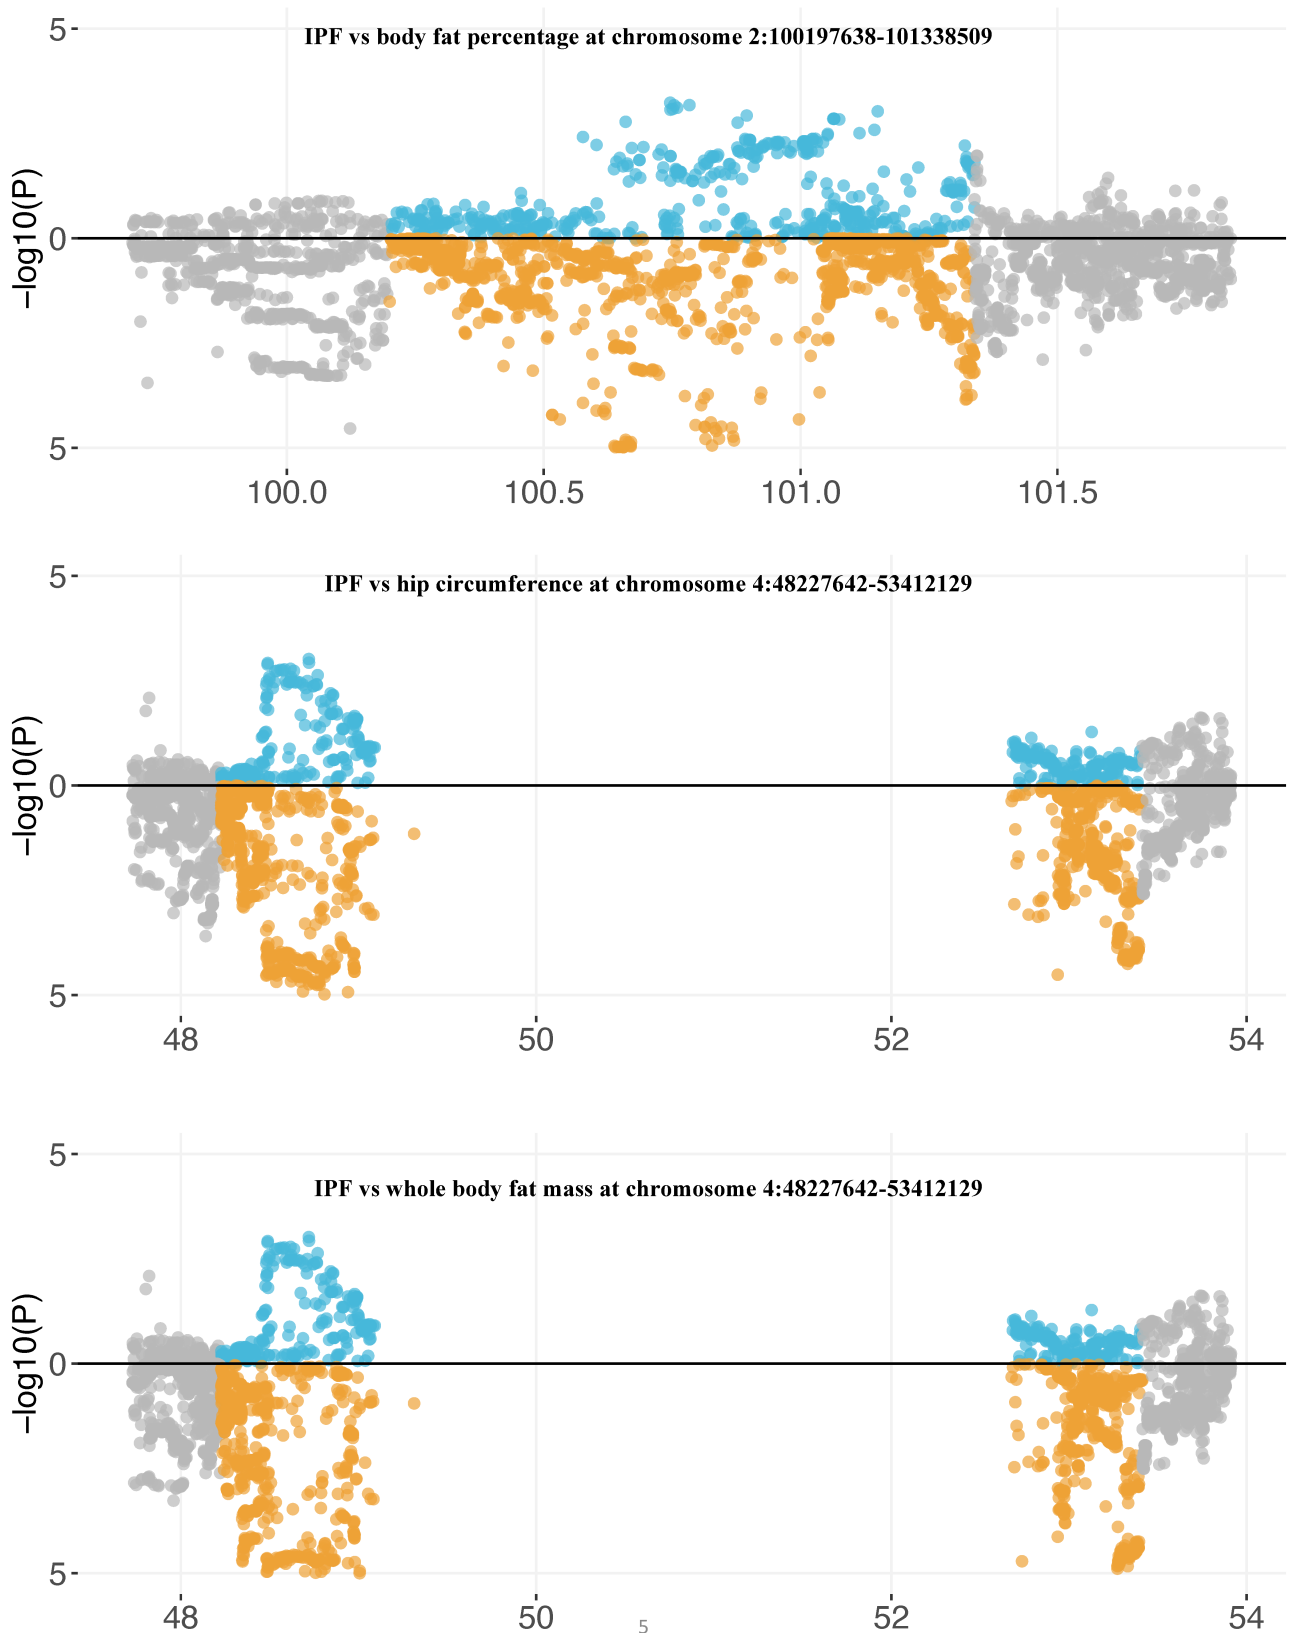

**S Figure 2. The mirror Manhattan plot of GWAS signals for IPF and the locally correlated trait.**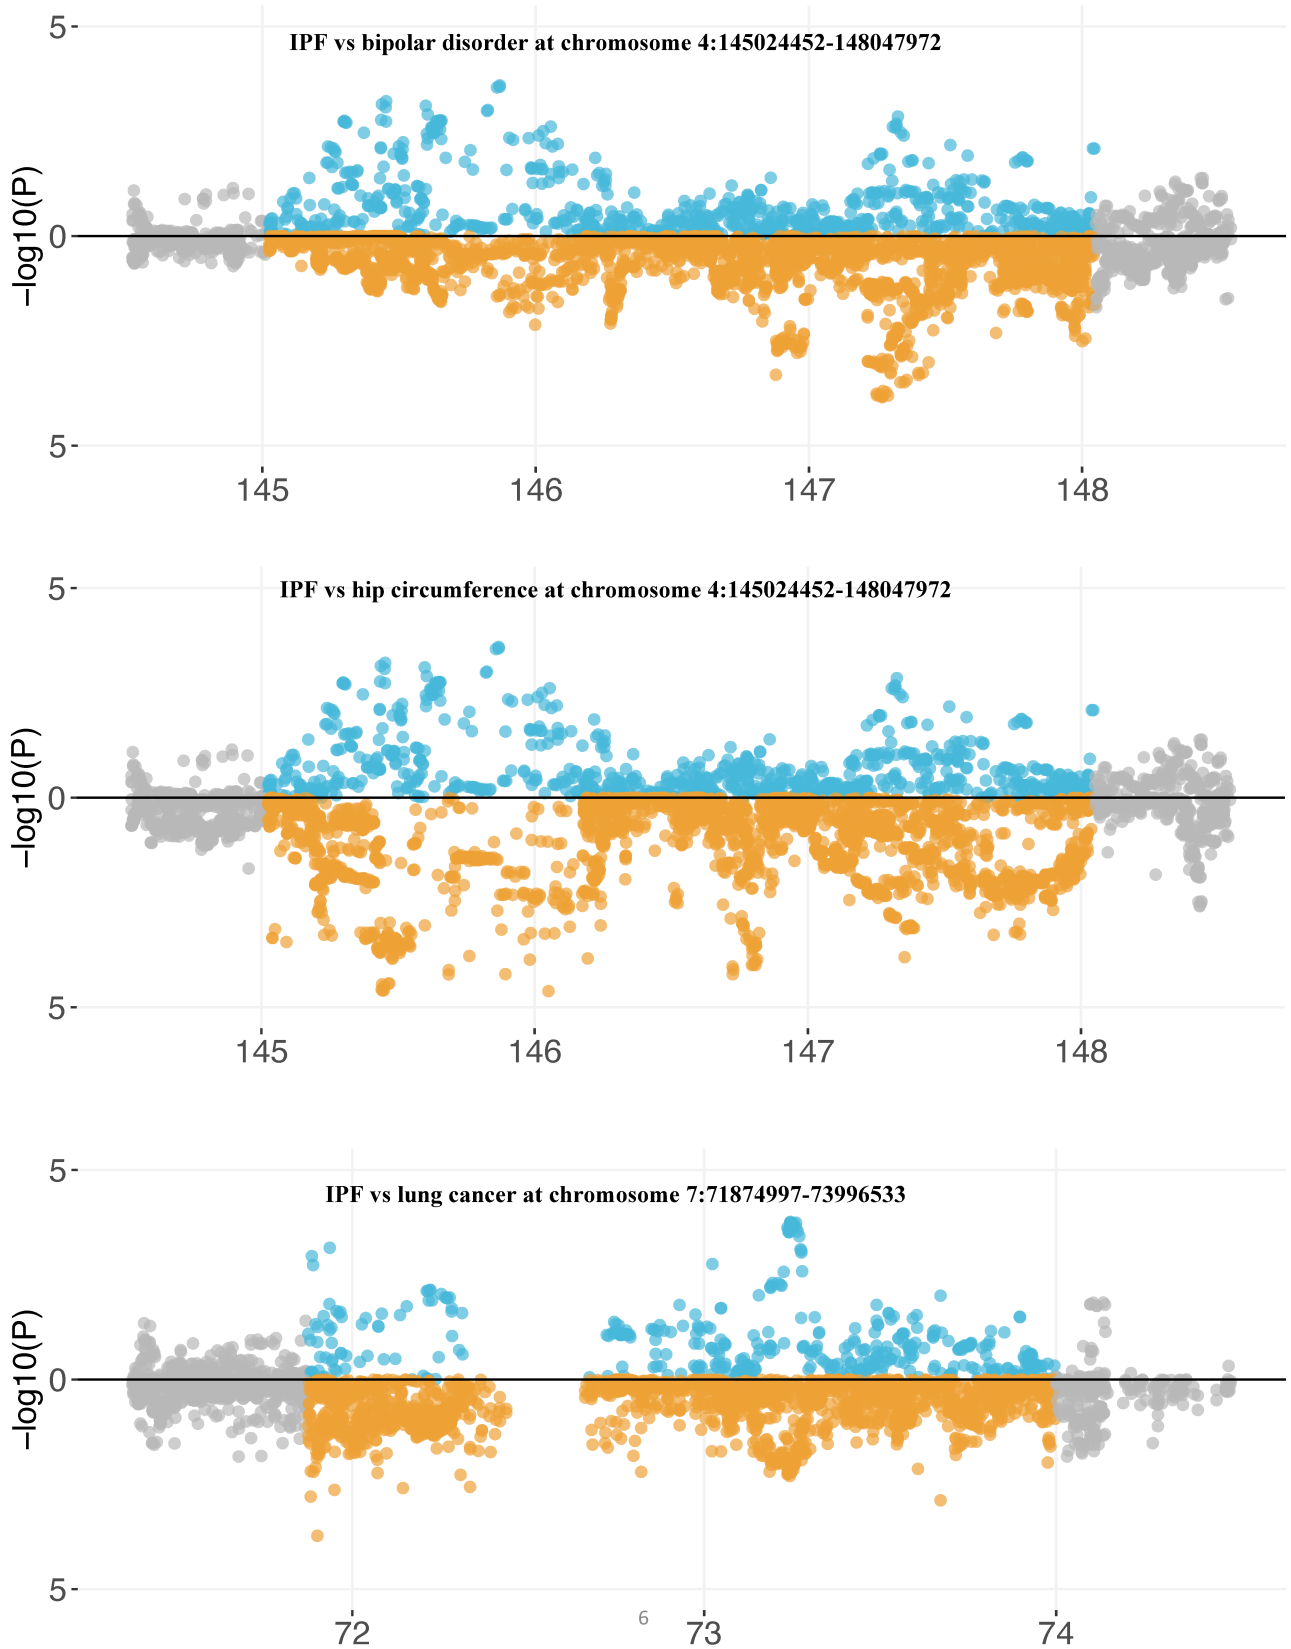

**S Figure 3. The mirror Manhattan plot of GWAS signals for IPF and the locally correlated trait.****IPF vs non-infective gastro-enteritis and colitis at chromosome 7:124155319-125386718**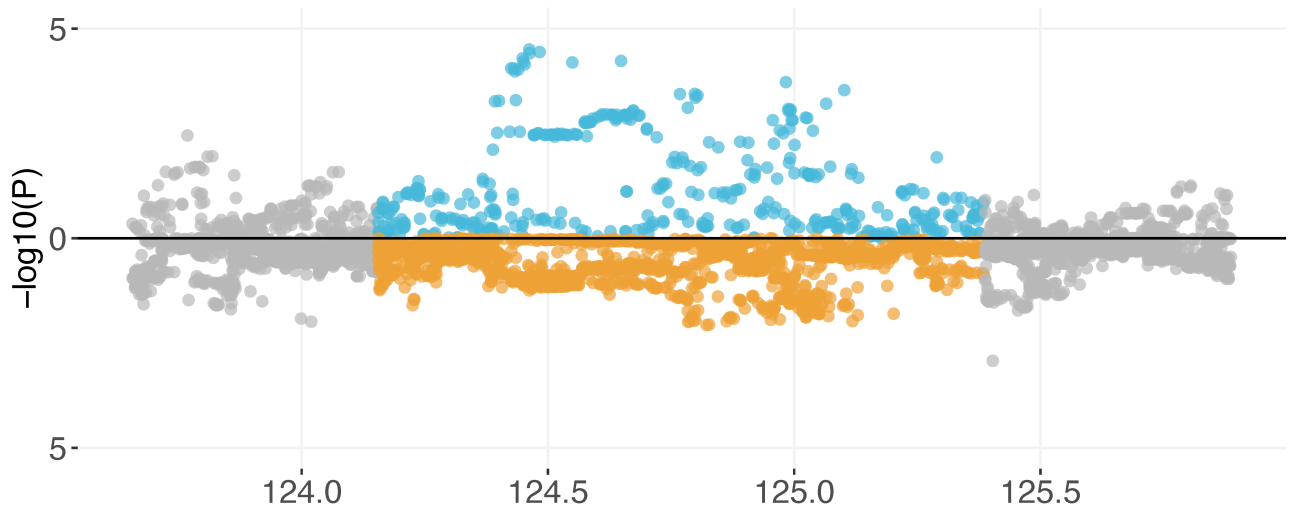**IPF vs lung cancer at chromosome 7:124155319-125386718**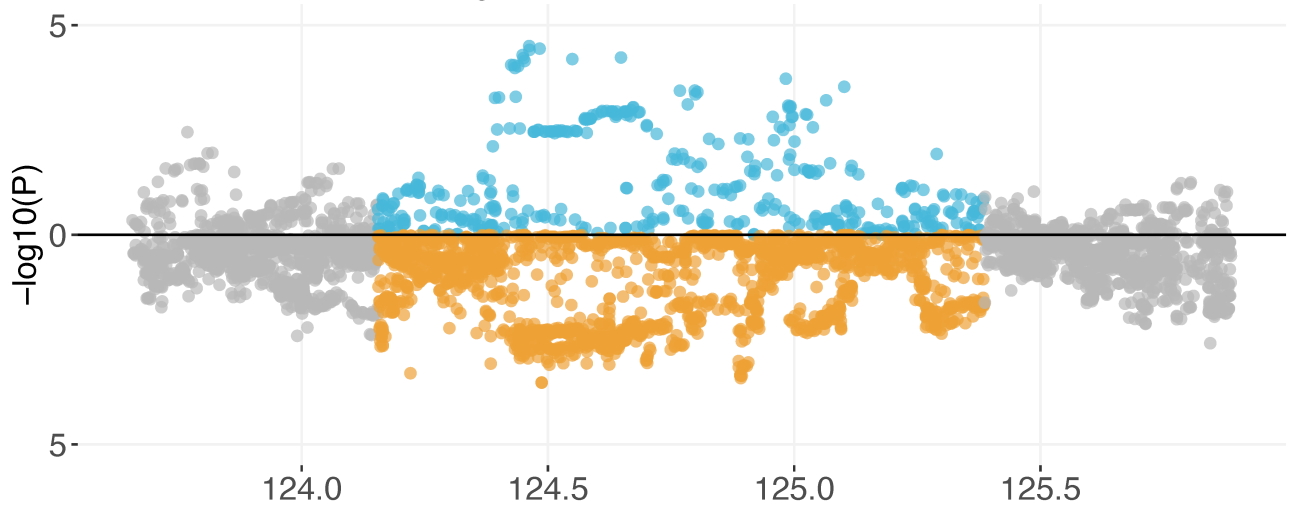**IPF vs lung cancer at chromosome 7:124155319-125386718**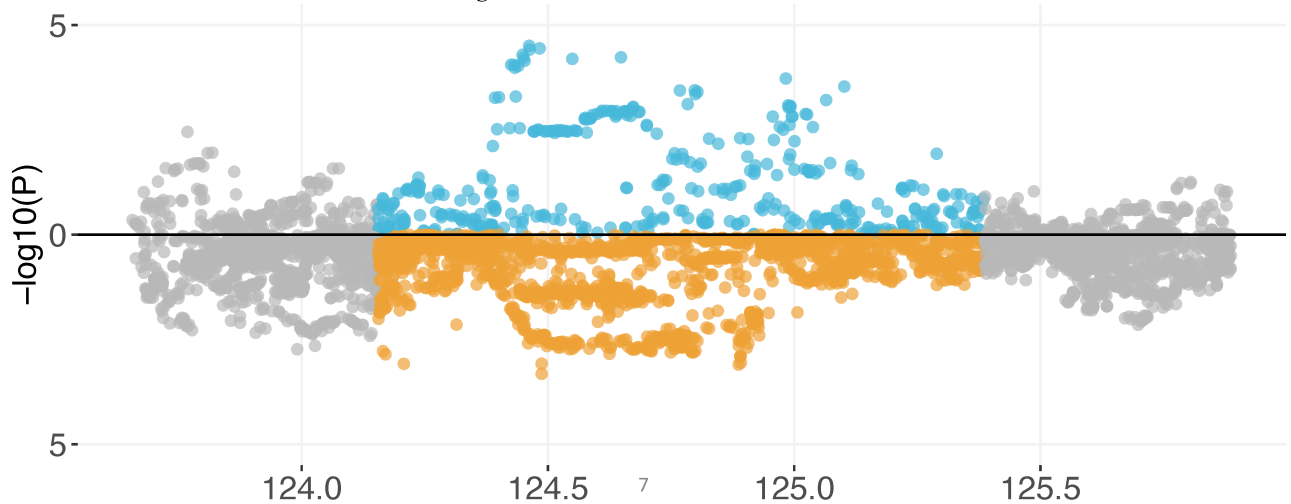

**S Figure 4. The mirror Manhattan plot of GWAS signals for IPF and the locally correlated trait.**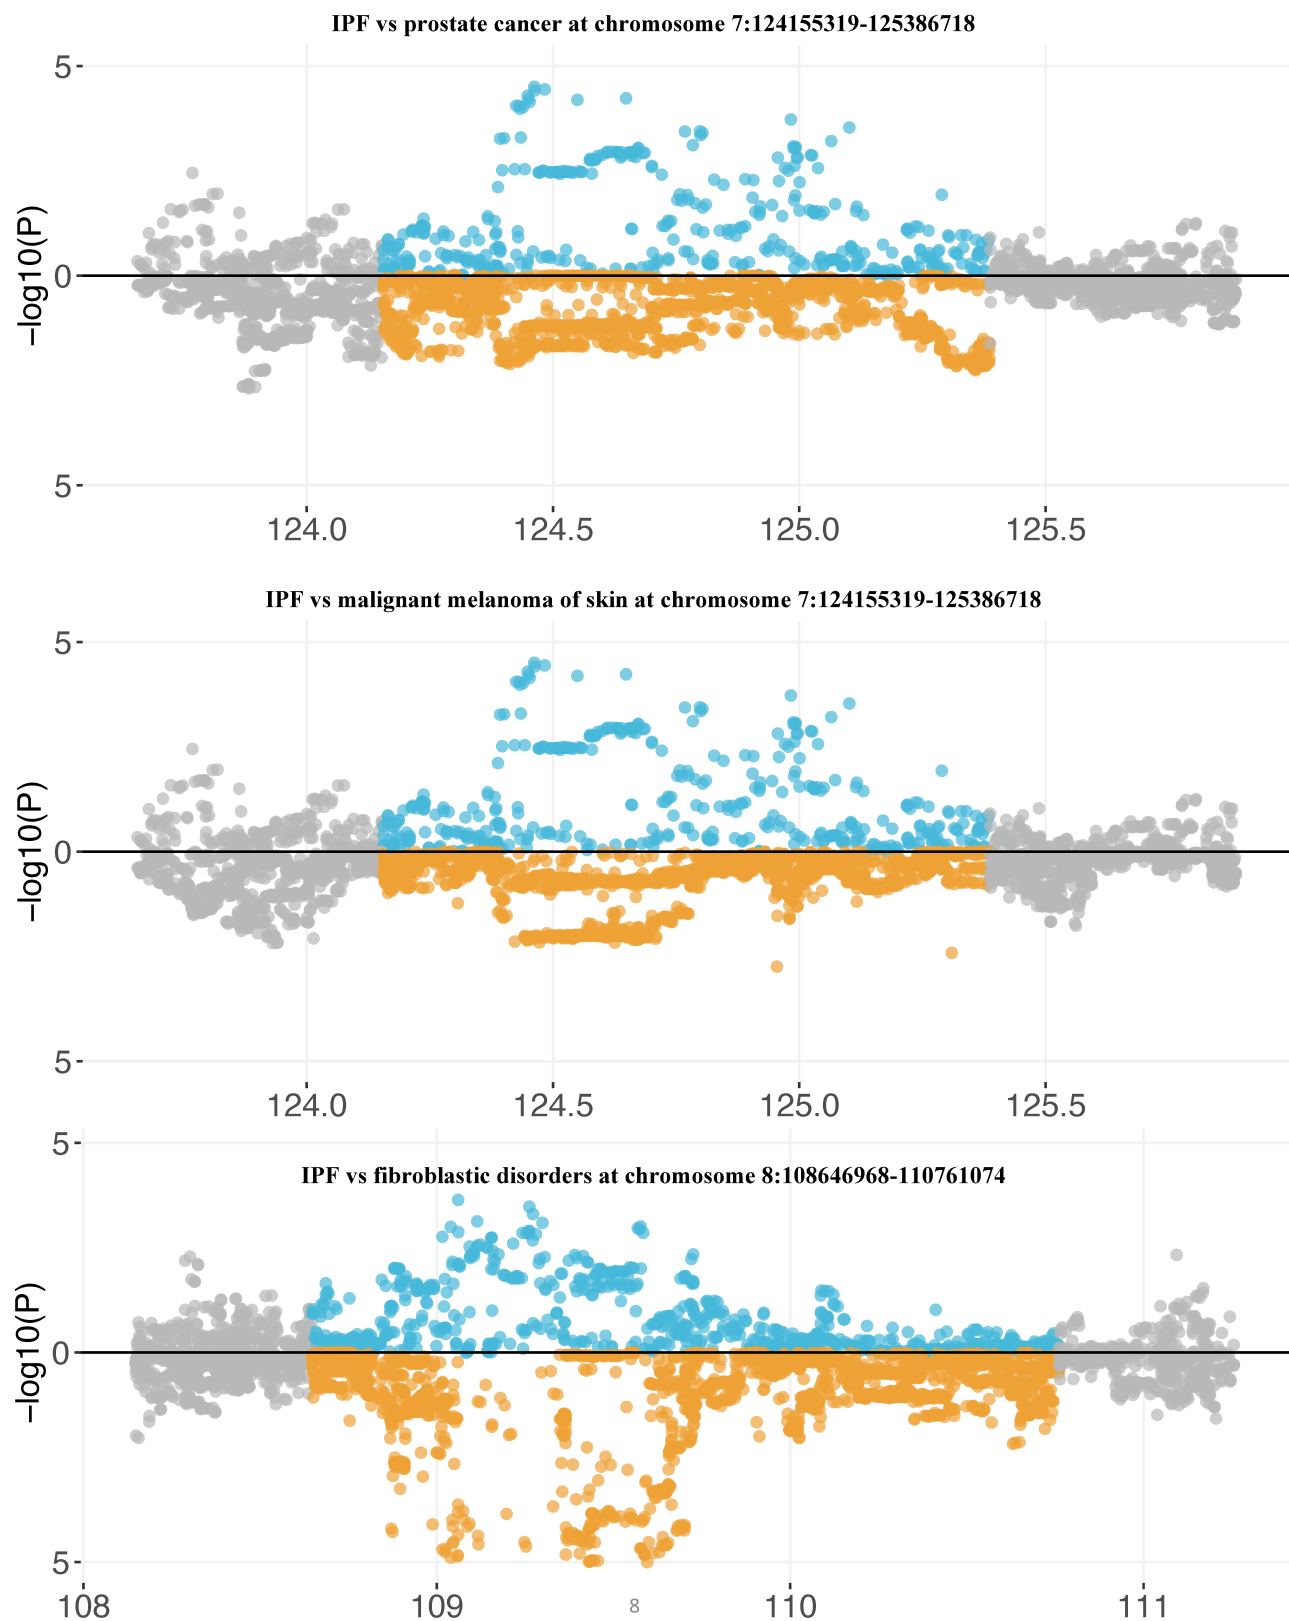



**S Figure 5. The mirror Manhattan plot of GWAS signals for IPF and the locally correlated trait.**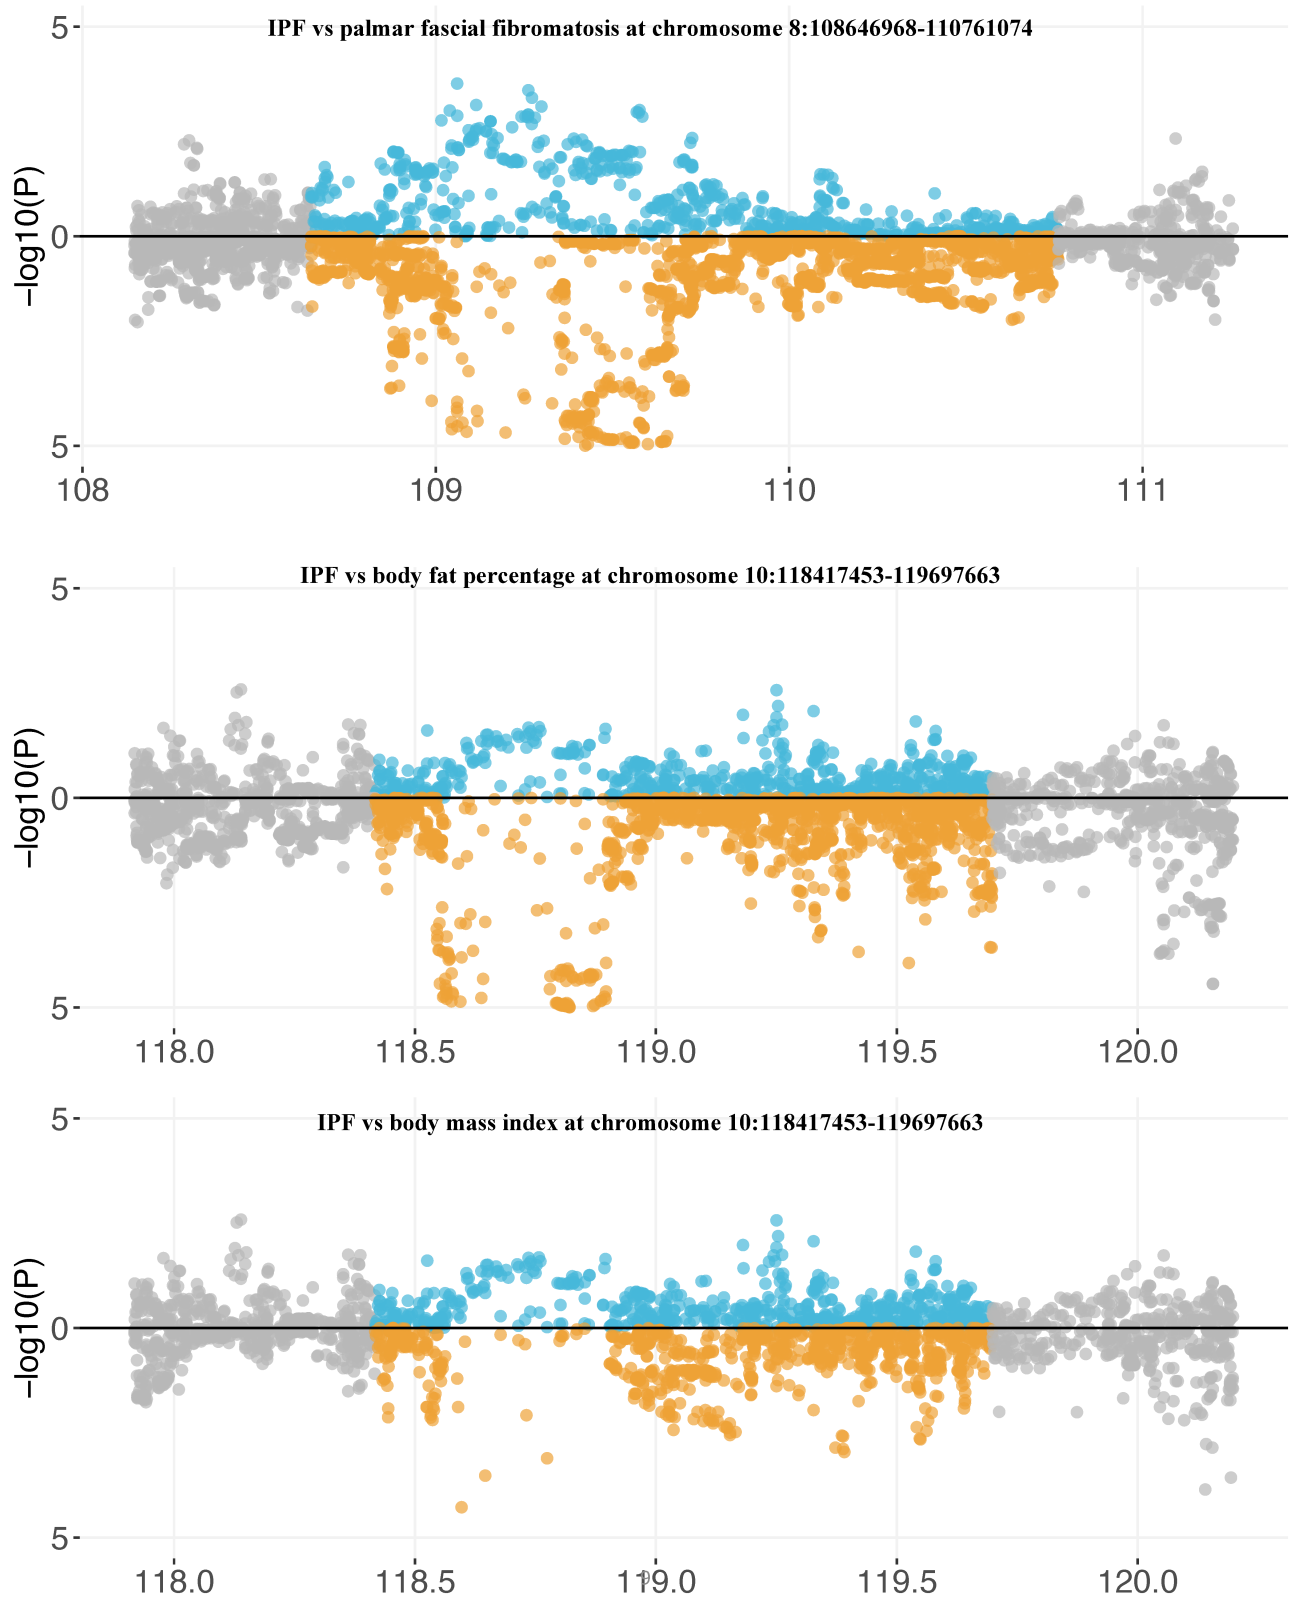

**S Figure 6. The mirror Manhattan plot of GWAS signals for IPF and the locally correlated trait.**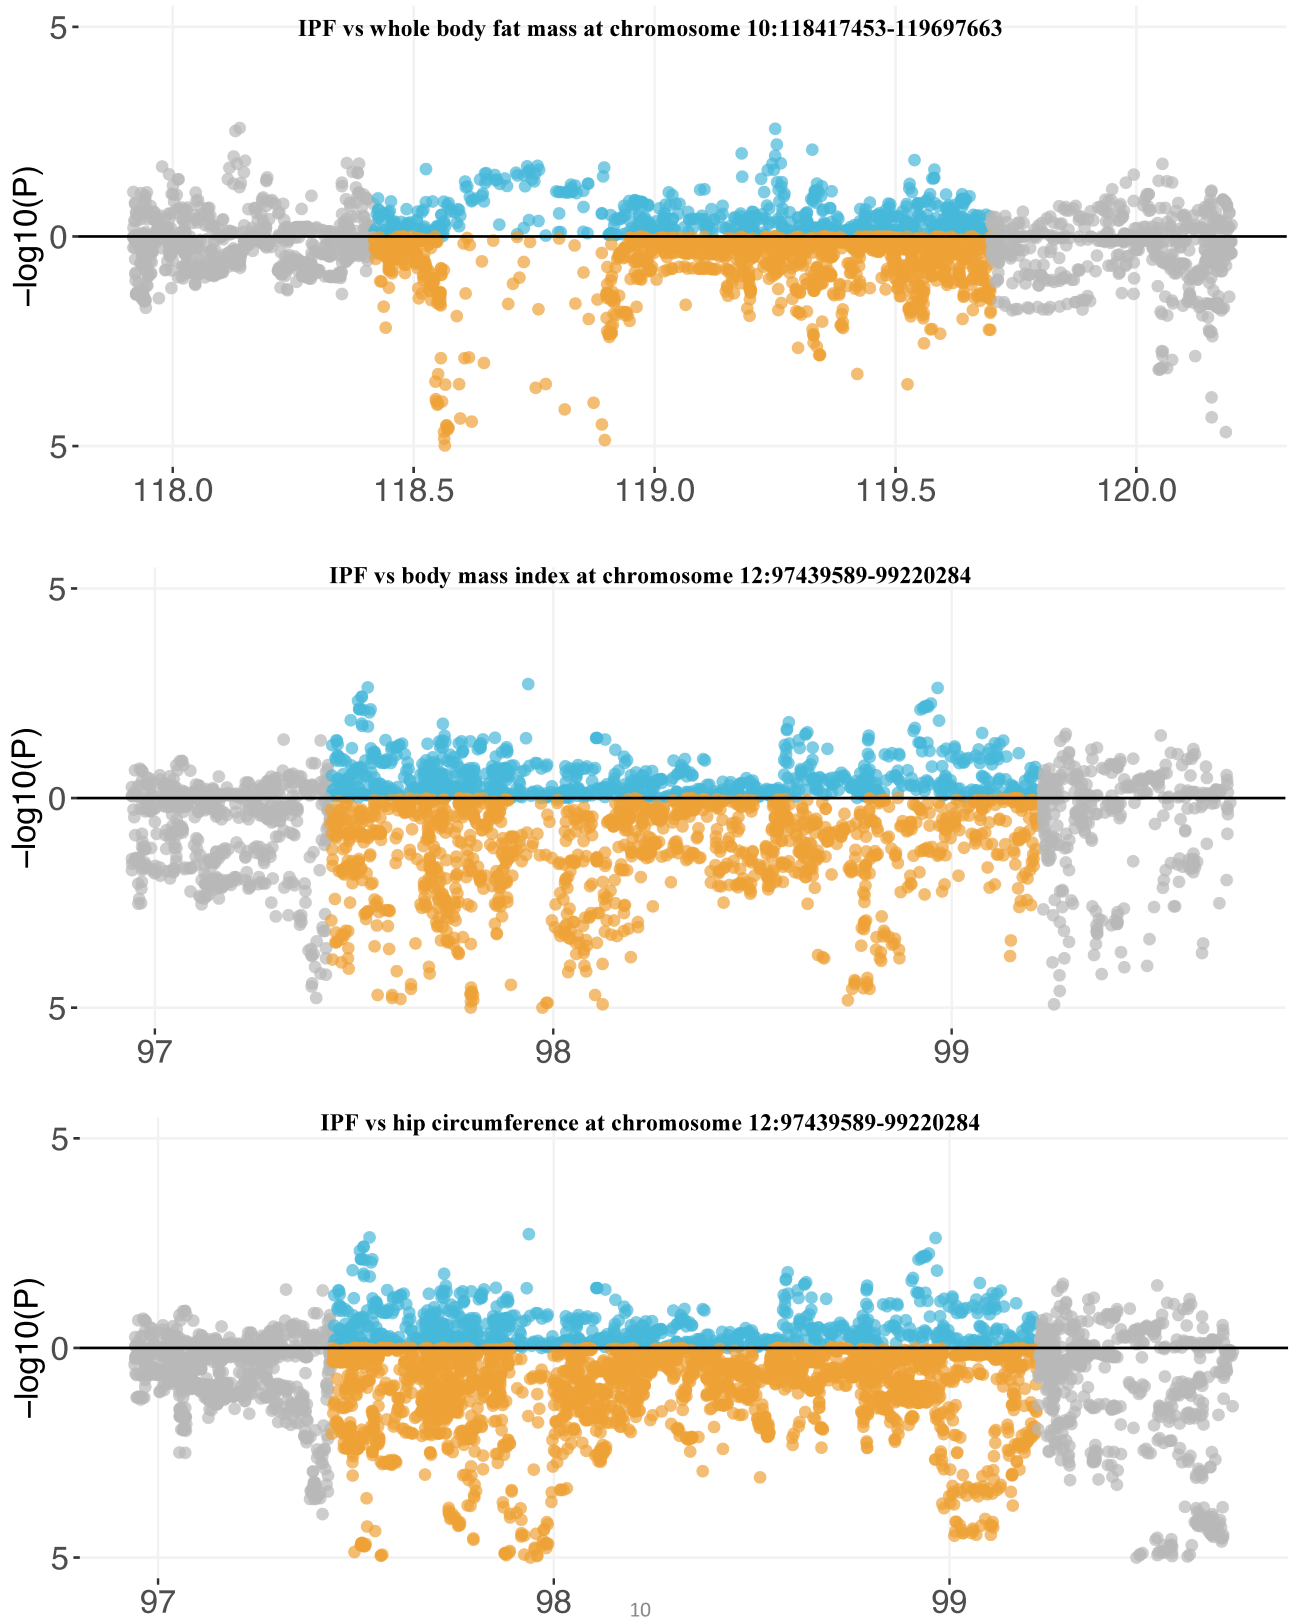

**S Figure 7. The mirror Manhattan plot of GWAS signals for IPF and the locally correlated trait.**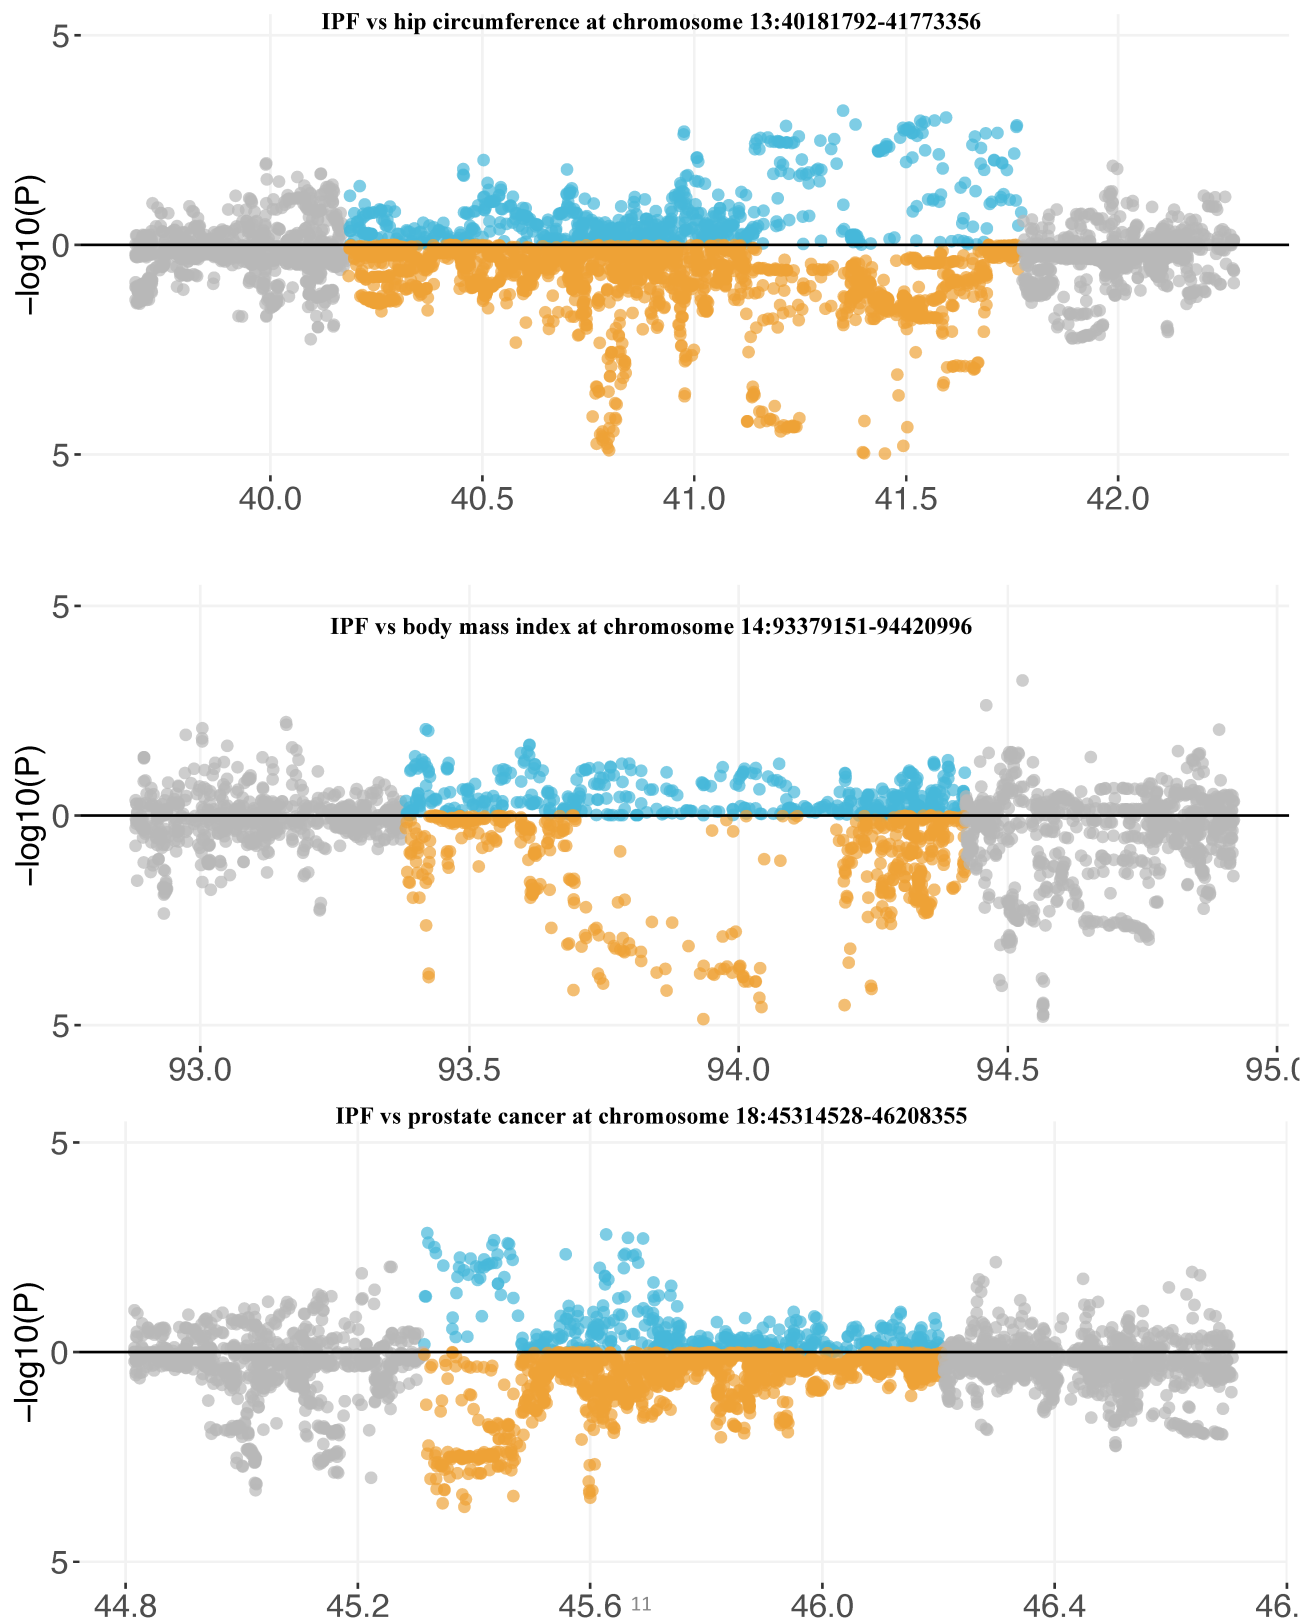

**S Figure 8. The mirror Manhattan plot of GWAS signals for IPF and the locally correlated trait.**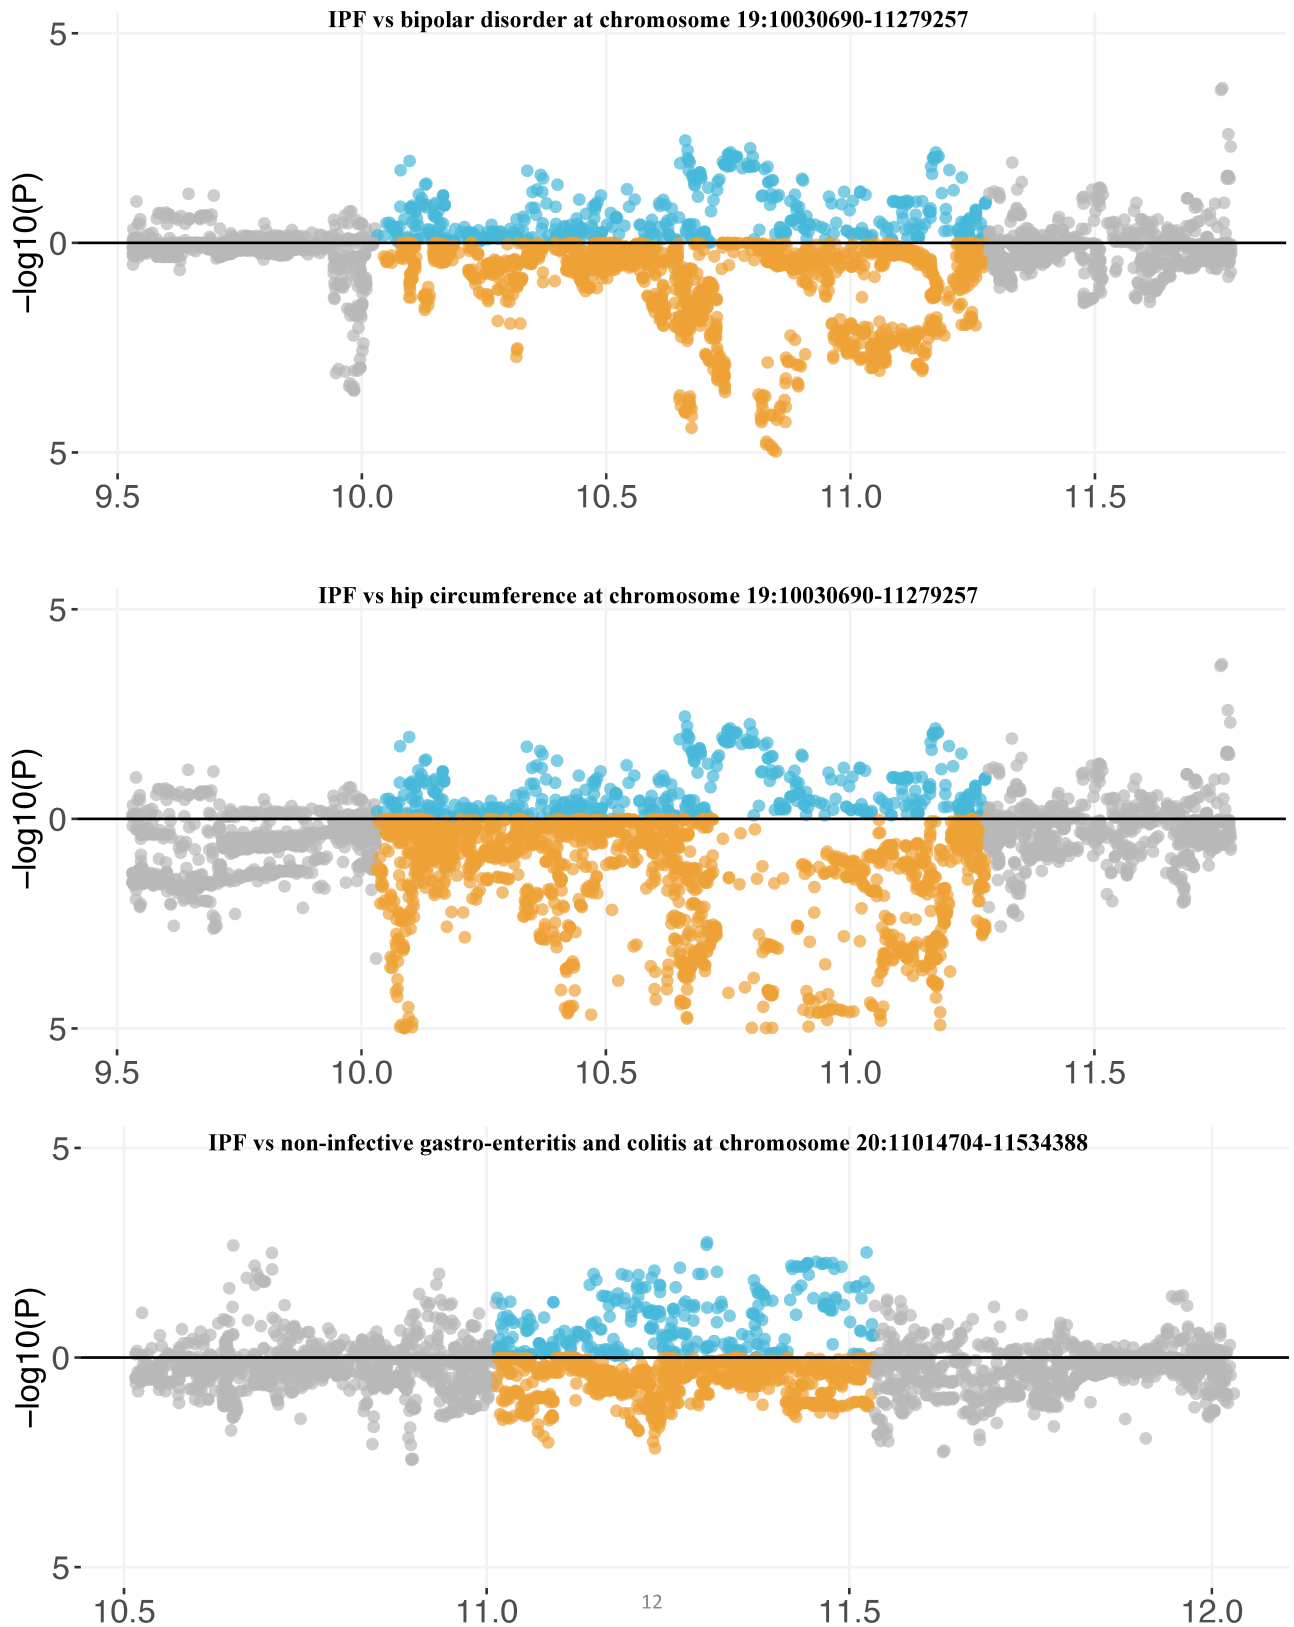

**S Figure 9. The mirror Manhattan plot of GWAS signals for IPF and the locally correlated trait.**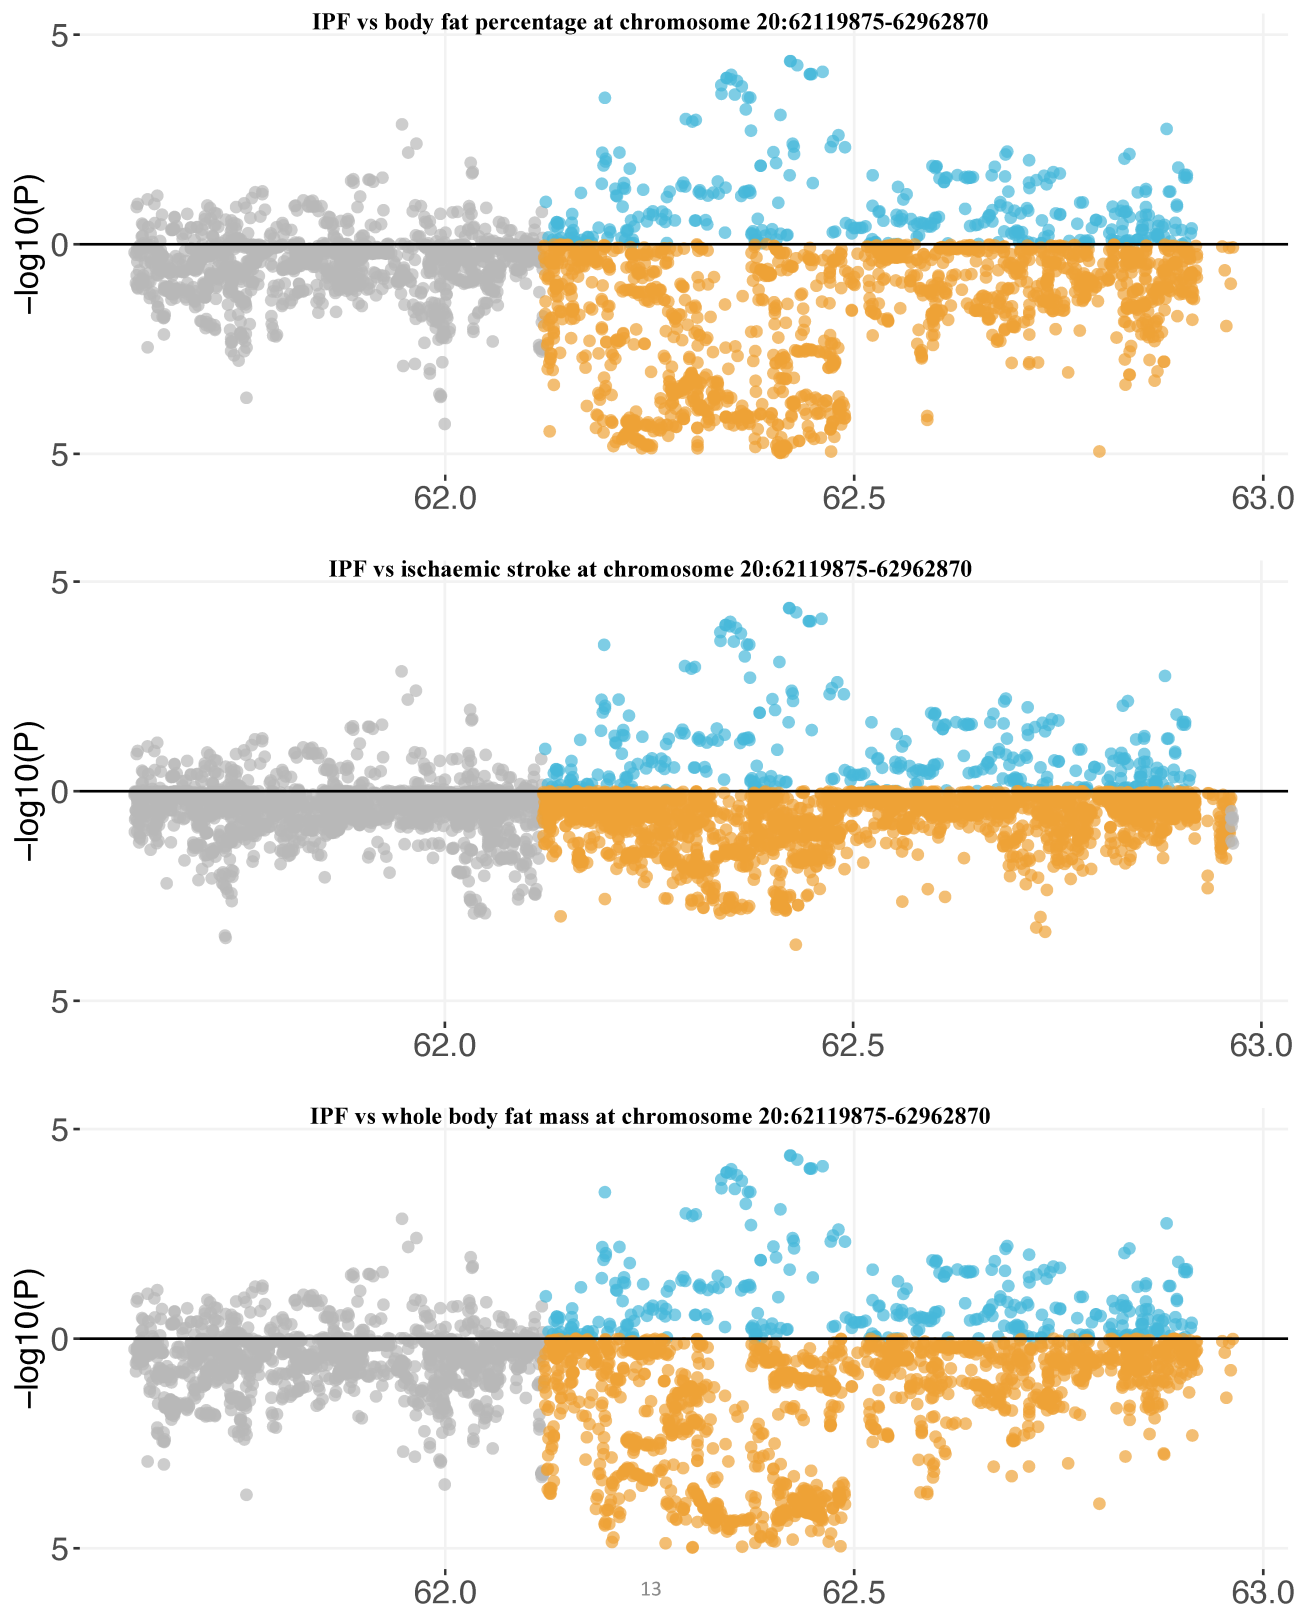

S Figure 10. Locus zoom plot for genome regions of 1Mb around genes identified by TWAS

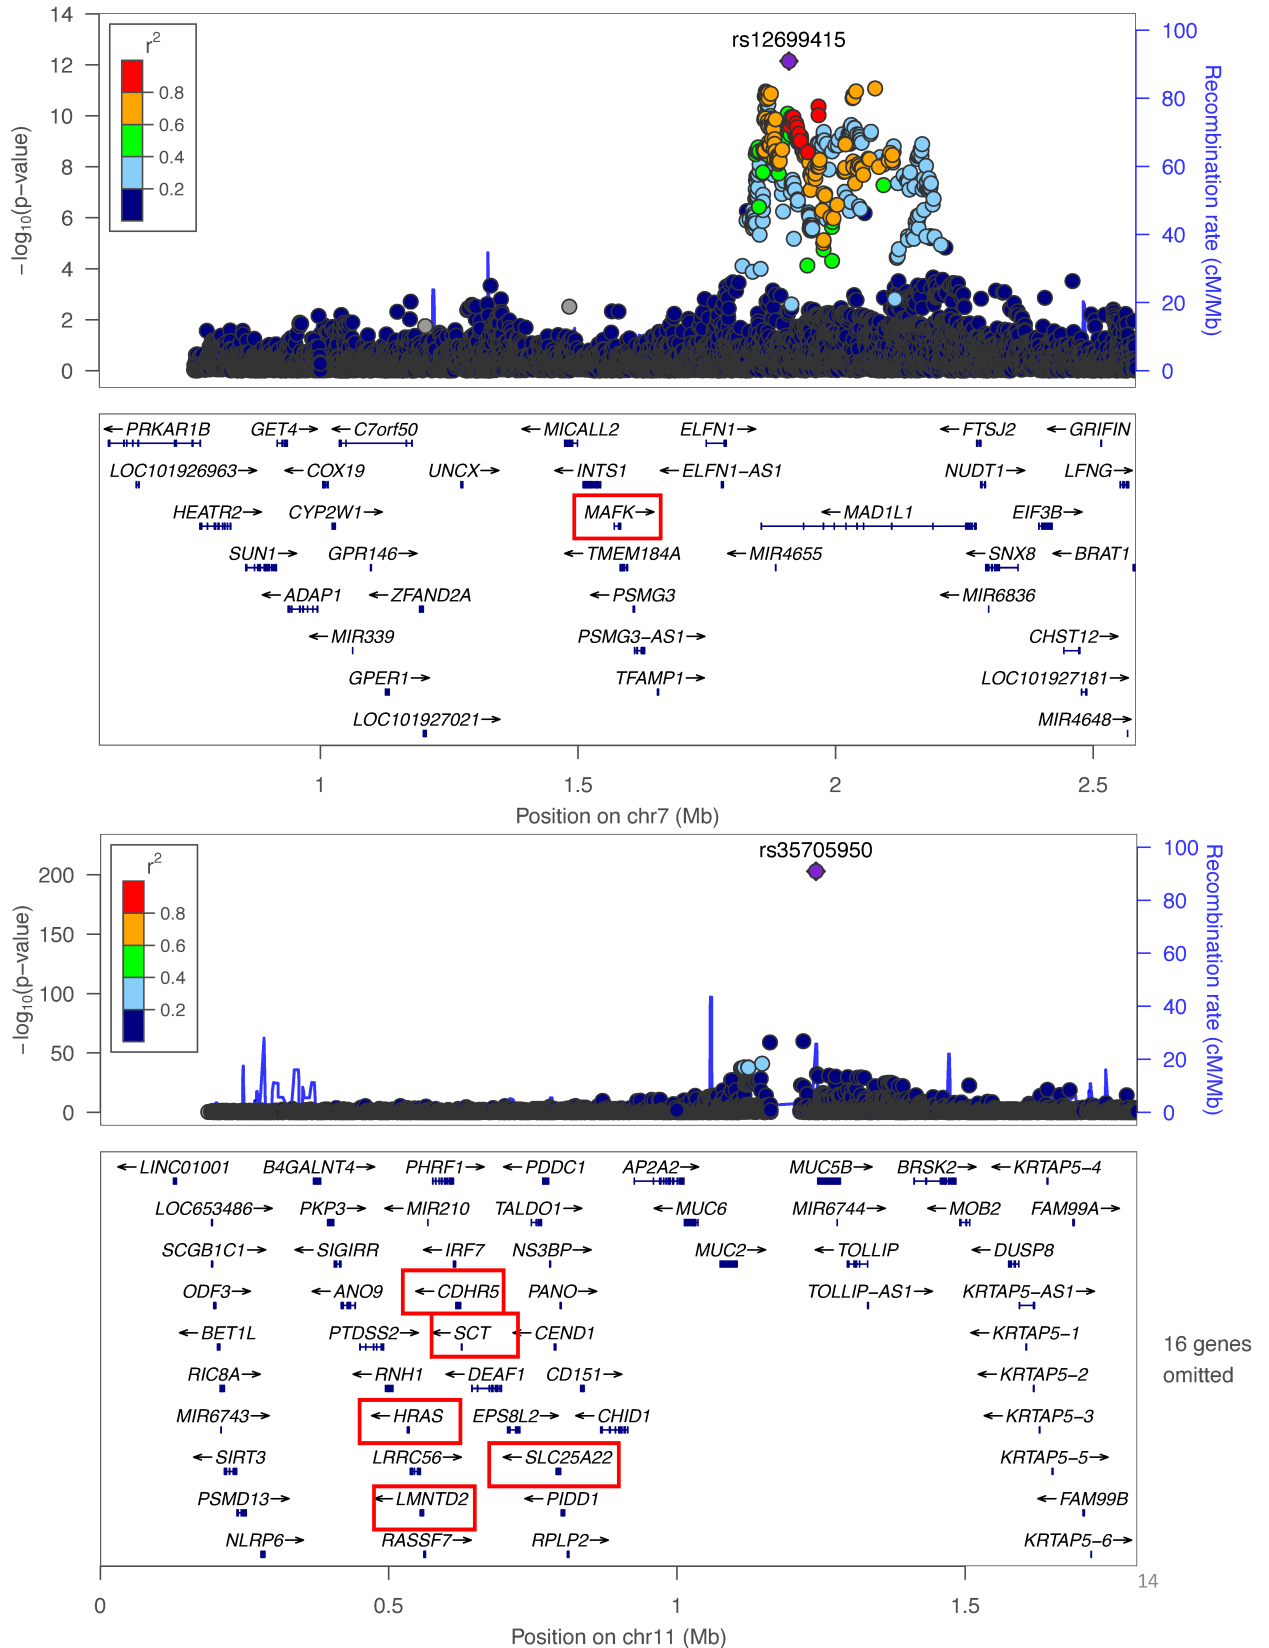

**S Figure 11. Locus zoom plot for genome regions of 1Mb around genes identified by TWAS**

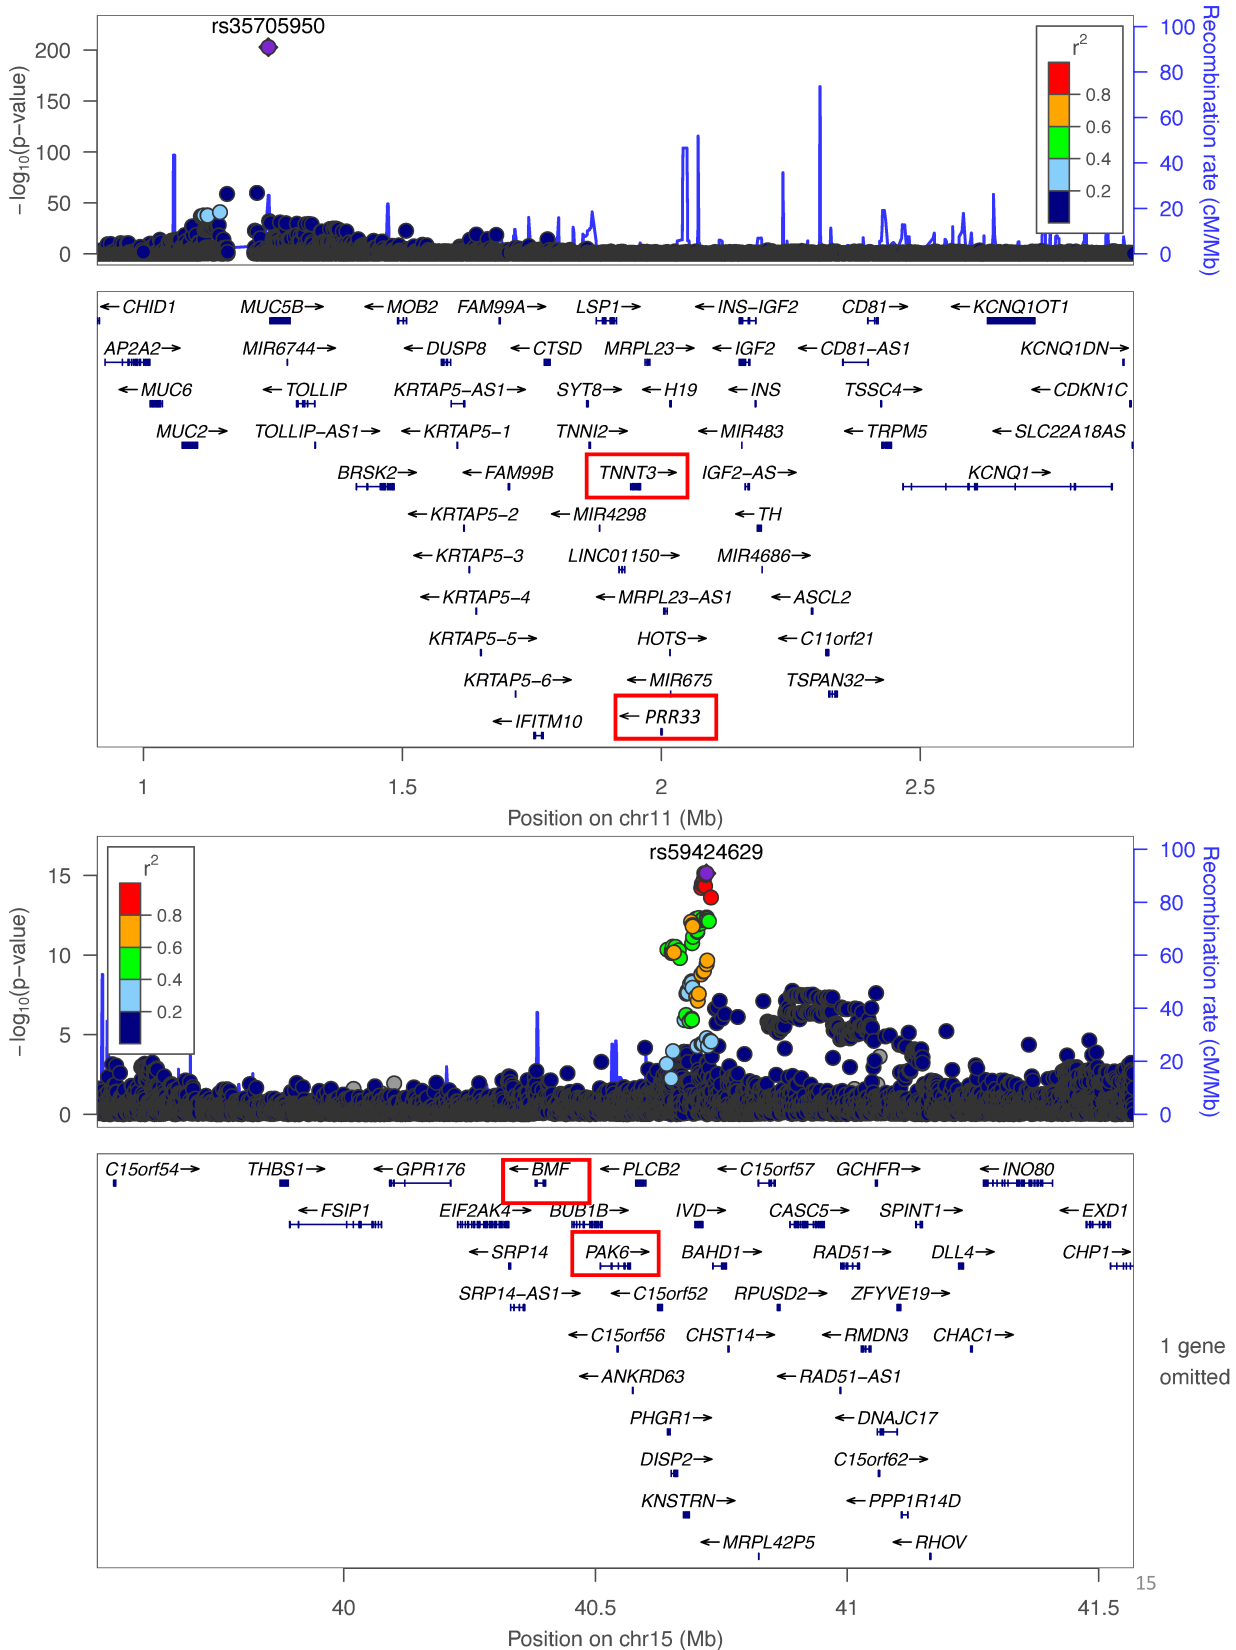

S Figure 12. Locus zoom plot for genome regions of 1Mb around genes identified by TWAS

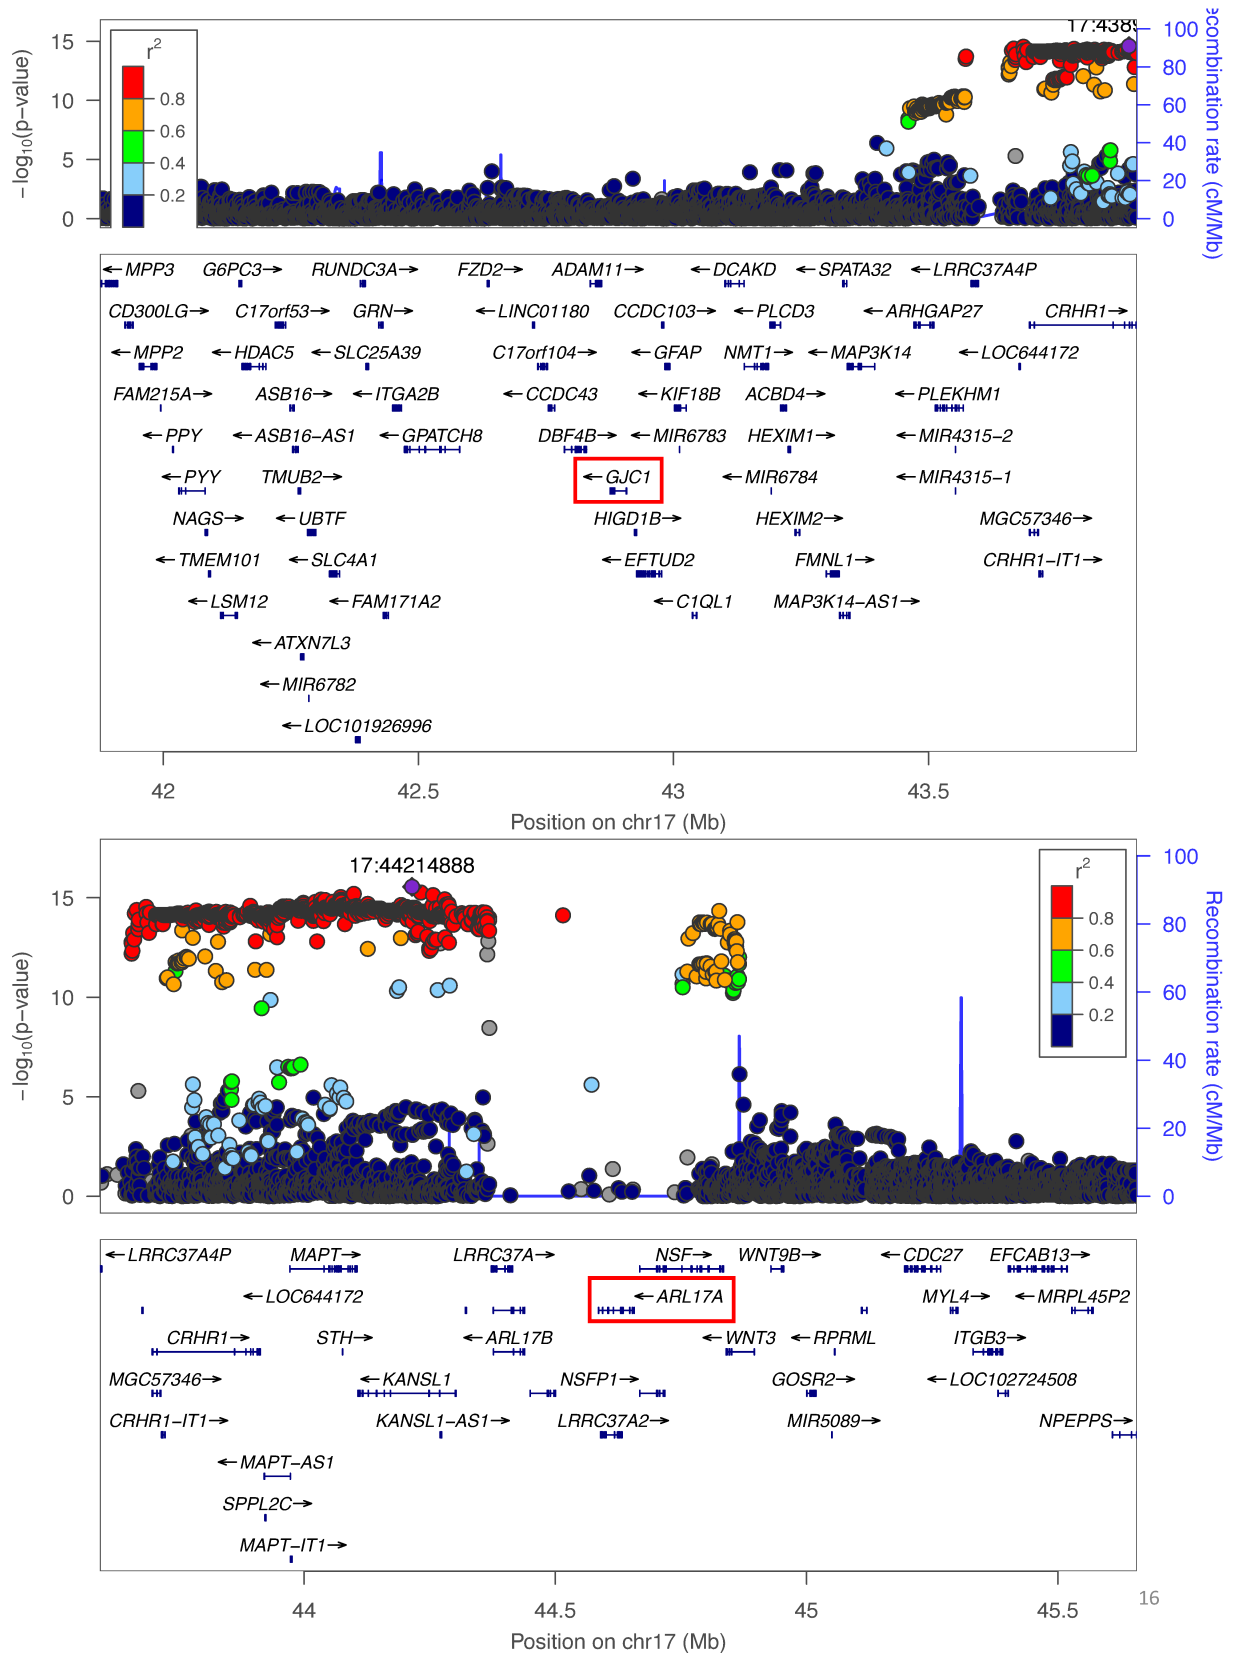



**S Table 1: Global genetic correlations between UK Biobank traits and IPF (FDR < 0.05)**

| Trait                                                                        | h <sup>2</sup> | Rho    | Correlation | Rho SE | P-value  |
|------------------------------------------------------------------------------|----------------|--------|-------------|--------|----------|
| Fibroblastic disorders                                                       | 0.017          | 0.027  | 0.42        | 0.0057 | 1.50E-06 |
| Ischaemic Stroke                                                             | 0.062          | 0.051  | 0.41        | 0.0116 | 1.09E-05 |
| Palmar fascial fibromatosis [Dupuytren]                                      | 0.017          | 0.024  | 0.36        | 0.0056 | 1.80E-05 |
| Arm fat percentage                                                           | 0.194          | 0.030  | 0.13        | 0.0074 | 6.20E-05 |
| Body Mass Index                                                              | 0.164          | 0.024  | 0.17        | 0.0061 | 6.14E-05 |
| Other/unspecified dorsalgia                                                  | 0.004          | -0.016 | -0.51       | 0.0038 | 4.72E-05 |
| Diagnoses - main ICD10: S42 Fracture of shoulder and upper arm               | 0.002          | 0.014  | 0.66        | 0.0036 | 7.70E-05 |
| Insomnia                                                                     | 0.042          | -0.026 | -0.25       | 0.0070 | 2.09E-04 |
| Body fat percentage                                                          | 0.200          | 0.036  | 0.16        | 0.0097 | 2.64E-04 |
| Type 2 diabetes with ophthalmic complications                                | 0.001          | 0.013  | 0.69        | 0.0034 | 2.49E-04 |
| Total protein (quantile)                                                     | 0.190          | 0.006  | 0.03        | 0.0017 | 4.35E-04 |
| Whole body fat mass                                                          | 0.207          | 0.033  | 0.14        | 0.0094 | 4.10E-04 |
| Diagnoses - main ICD10: C34 Malignant neoplasm of bronchus and lung          | 0.003          | 0.014  | 0.53        | 0.0042 | 8.59E-04 |
| Diagnoses - main ICD10: E04 Other non-toxic goitre                           | 0.005          | -0.013 | -0.34       | 0.0037 | 7.53E-04 |
| Diseases of the nervous system                                               | 0.014          | 0.013  | 0.21        | 0.0038 | 7.76E-04 |
| Hip circumference                                                            | 0.193          | 0.036  | 0.16        | 0.0104 | 6.52E-04 |
| Malignant melanoma of skin                                                   | 0.004          | 0.016  | 0.50        | 0.0048 | 8.89E-04 |
| Malignant neoplasm of respiratory system and intrathoracic organs            | 0.003          | 0.019  | 0.72        | 0.0058 | 8.48E-04 |
| Diagnoses - main ICD10: K52 Other non-infective gastro-enteritis and colitis | 0.006          | 0.012  | 0.32        | 0.0037 | 1.13E-03 |
| Creatinine (quantile)                                                        | 0.187          | -0.005 | -0.02       | 0.0015 | 1.65E-03 |
| Diagnoses - main ICD10: C61 Malignant neoplasm of prostate                   | 0.010          | -0.014 | -0.27       | 0.0043 | 1.75E-03 |
| Non-cancer illness code, self-reported: prolapsed disc/slipped disc          | 0.007          | 0.013  | 0.30        | 0.0040 | 1.82E-03 |
| SHBG (quantile)                                                              | 0.185          | -0.005 | -0.02       | 0.0016 | 1.69E-03 |
| Bipolar Disorder                                                             | 0.296          | 0.035  | 0.17        | 0.0114 | 2.20E-03 |
| Hernia                                                                       | 0.017          | -0.019 | -0.29       | 0.0063 | 2.64E-03 |
| Non-cancer illness code, self-reported: rheumatoid arthritis                 | 0.012          | -0.014 | -0.26       | 0.0048 | 2.57E-03 |
| Asthma-related pneumonia                                                     | 0.003          | 0.012  | 0.40        | 0.0040 | 3.44E-03 |

**S Table 2: Significant local regions from SUPERGNOVA (FDR < 0.05)**

| GRCh37 |           |           | Rho     | Correlation | IPF h <sup>2</sup> | Trait h <sup>2</sup> | Variance | P value  | Number of SNP | Trait                                      |
|--------|-----------|-----------|---------|-------------|--------------------|----------------------|----------|----------|---------------|--------------------------------------------|
| Chr    | Start     | End       |         |             |                    |                      |          |          |               |                                            |
| 2      | 100197638 | 101338509 | 0.0009  | 1.076       | 0.0022             | 0.00033              | 5.37E-08 | 7.41E-05 | 450           | Body fat percentage                        |
| 4      | 48227642  | 53412129  | -0.0004 | -1.148      | 0.0007             | 0.00020              | 1.29E-08 | 1.07E-04 | 398           | Hip circumference                          |
| 4      | 48227642  | 53412129  | -0.0005 | -1.171      | 0.0007             | 0.00022              | 1.37E-08 | 7.64E-05 | 398           | Whole body fat mass                        |
| 4      | 145024452 | 148047972 | 0.0015  | 1.320       | 0.0027             | 0.00049              | 1.36E-07 | 3.64E-05 | 800           | Bipolar disorder                           |
| 4      | 145024452 | 148047972 | 0.0015  | 0.893       | 0.0030             | 0.00099              | 1.11E-07 | 4.35E-06 | 822           | Hip circumference                          |
| 7      | 71874997  | 73996533  | -0.0010 | -1.391      | 0.0034             | 0.00015              | 5.61E-08 | 2.83E-05 | 388           | Lung cancer                                |
| 7      | 124155319 | 125386718 | 0.0003  | 1.623       | 0.0027             | 0.00001              | 5.96E-09 | 3.71E-05 | 376           | Non-infective gastro-enteritis and colitis |
| 7      | 124155319 | 125386718 | -0.0010 | -0.959      | 0.0028             | 0.00040              | 3.55E-08 | 7.66E-08 | 376           | Lung cancer                                |
| 7      | 124155319 | 125386718 | -0.0003 | -1.265      | 0.0027             | 0.00003              | 5.57E-09 | 7.04E-06 | 376           | Prostate cancer                            |
| 7      | 124155319 | 125386718 | -0.0003 | -1.247      | 0.0027             | 0.00003              | 4.69E-09 | 8.73E-07 | 376           | Malignant melanoma of skin                 |
| 8      | 108646968 | 110761074 | 0.0014  | 1.096       | 0.0021             | 0.00077              | 6.49E-08 | 3.55E-08 | 722           | Fibroblastic disorders                     |
| 8      | 108646968 | 110761074 | 0.0014  | 1.100       | 0.0021             | 0.00074              | 6.24E-08 | 2.77E-08 | 722           | Palmar fascial fibromatosis                |
| 10     | 118417453 | 119697663 | 0.0008  | 3.467       | 0.0001             | 0.00040              | 3.44E-08 | 4.04E-05 | 596           | Body fat percentage                        |
| 10     | 118417453 | 119697663 | 0.0006  | 4.374       | 0.0001             | 0.00029              | 2.12E-08 | 1.25E-05 | 521           | Body mass index                            |
| 10     | 118417453 | 119697663 | 0.0009  | 3.647       | 0.0001             | 0.00046              | 3.41E-08 | 2.93E-06 | 596           | Whole body fat mass                        |
| 12     | 97439589  | 99220284  | -0.0008 | -1.619      | 0.0006             | 0.00036              | 3.71E-08 | 5.02E-05 | 801           | Body mass index                            |
| 12     | 97439589  | 99220284  | -0.0009 | -2.074      | 0.0004             | 0.00046              | 4.93E-08 | 2.90E-05 | 873           | Hip circumference                          |
| 13     | 40181792  | 41773356  | 0.0007  | 0.755       | 0.0037             | 0.00025              | 3.24E-08 | 6.52E-05 | 629           | Hip circumference                          |
| 14     | 93379151  | 94420996  | 0.0005  | 1.749       | 0.0002             | 0.00050              | 1.93E-08 | 9.68E-05 | 397           | Body mass index                            |
| 18     | 45314528  | 46208355  | 0.0004  | 1.447       | 0.0014             | 0.00006              | 1.20E-08 | 8.24E-05 | 410           | Prostate cancer                            |
| 19     | 10030690  | 11279257  | -0.0018 | -1.248      | 0.0015             | 0.00141              | 1.53E-07 | 2.40E-06 | 361           | Bipolar disorder                           |
| 19     | 10030690  | 11279257  | 0.0011  | 1.132       | 0.0016             | 0.00053              | 5.17E-08 | 3.17E-06 | 423           | Hip circumference                          |
| 20     | 11014704  | 11534388  | -0.0003 | -1.688      | 0.0019             | 0.00002              | 6.20E-09 | 8.78E-05 | 288           | Non-infective gastro-enteritis and colitis |
| 20     | 62119875  | 62962870  | 0.0014  | 0.893       | 0.0054             | 0.00044              | 1.09E-07 | 2.94E-05 | 322           | Body fat percentage                        |
| 20     | 62119875  | 62962870  | 0.0023  | 1.068       | 0.0054             | 0.00083              | 2.94E-07 | 3.28E-05 | 324           | Ischaemic Stroke                           |
| 20     | 62119875  | 62962870  | 0.0011  | 0.872       | 0.0054             | 0.00032              | 8.26E-08 | 6.64E-05 | 322           | Whole body fat mass                        |

**S Table 3: Novel IPF candidate genes identified in correlated local regions.**

| Gene           | Functions                                                                                                                                                                                                                                                                                                                                                                                            | Region (hg19)                | Trait                                |
|----------------|------------------------------------------------------------------------------------------------------------------------------------------------------------------------------------------------------------------------------------------------------------------------------------------------------------------------------------------------------------------------------------------------------|------------------------------|--------------------------------------|
| <i>ANAPC10</i> | a subunit of anaphase-promoting complex (APC), related to cell cycle[1].                                                                                                                                                                                                                                                                                                                             | chr4:145,024,452-148047972   | hip circumference                    |
| <i>HHIP</i>    | encodes a member of the hedgehog (HH)-interacting protein family. HHIP is implicated in vitro models of alveolar epithelial metaplasia [2]. It suppressed HH signaling pathway to inhibit proliferation and promote differentiation of adipocytes[3].                                                                                                                                                |                              |                                      |
|                | encodes a protein relating to telomere maintenance.                                                                                                                                                                                                                                                                                                                                                  |                              |                                      |
| <i>POT1</i>    | POT1 is involved in telomere maintenance. Pulmonary fibrosis patients carrying POT1 variants had shorter telomeres, which led to a worse outcome of IPF[30-32]. POT1 was reported to be associated with lung cancer[33]. Patients with high POT1 expression levels in lung cancer tissues showed an overall better survival rate, indicating a protective role of POT1 in lung cancer prognosis[34]. | chr7:124,155,319-125,386,718 | lung cancer                          |
| <i>RSPO2</i>   | a member of the R-spondin family of proteins; related to Wnt/ $\beta$ -catenin signaling[4]. It is upregulated and can have an antifibrotic role in IPF[5, 6].                                                                                                                                                                                                                                       | chr8:108,646,968-110,761,074 | fibroblastic disorders;              |
| <i>EIF3E</i>   | a translation initiation factor related to embryonic development and cell proliferation[7]. Decreased EIF3E expression might activate TGF- $\beta$ signaling to drive fibrosis[8].                                                                                                                                                                                                                   |                              | palmar fascial fibromatosis          |
| <i>RMST</i>    | a long non-coding RNA associated with severe obesity[9].                                                                                                                                                                                                                                                                                                                                             | chr12:97,439,589-99,220,284  | hip circumference<br>body mass index |
| <i>ZBTB7C</i>  | a TF related to cell proliferation and DNA damage response through physical interact with p53[10].                                                                                                                                                                                                                                                                                                   | chr18:45,314,528-46,208,355  | prostate cancer                      |
| <i>SMAD2</i>   | plays an important role in TGF- $\beta$ -induced apoptosis of prostate epithelial cells and tumor suppression[11, 12]; closely related to IPF through TGF- $\beta$ and SMAD signaling[13, 14].                                                                                                                                                                                                       |                              |                                      |
| <i>HELZ2</i>   | a nuclear transcriptional co-activator; related to adipocyte differentiation through its interaction with THRAP3[15].                                                                                                                                                                                                                                                                                |                              |                                      |
| <i>STMN3</i>   | a member of the stathmin protein family; related to protein domain specific binding and tubulin binding[16].                                                                                                                                                                                                                                                                                         | chr20: 62,119,875-62,962,870 | body fat percentage;                 |
| <i>RTEL1</i>   | related to the stability, protection and elongation of telomeres. Loss-of-function variants in RTEL1 are associated with shortened telomeres in pulmonary fibrosis [17-19].                                                                                                                                                                                                                          |                              | whole-body fat mass                  |
| <i>ZBTB46</i>  | a zinc finger TF defining the classical dendritic cell lineage[20].                                                                                                                                                                                                                                                                                                                                  |                              |                                      |

**S Table 4: TWAS UTMOST significant genes from joint analysis of 44 tissues from GTEx**

| Gene            | Test score | p value  | Position (GRCh37)        | Identified GWAS hit | Identified DEG |
|-----------------|------------|----------|--------------------------|---------------------|----------------|
| <i>MYNN</i>     | 507.64     | 2.34E-11 | chr3:169490619-169507504 |                     | T              |
| <i>PKD2</i>     | 17.99      | 8.56E-09 | chr4:88928799-88998931   |                     | T              |
| <i>PPMIK</i>    | 16.49      | 5.33E-08 | chr4:89178772-89205921   |                     | T              |
| <i>FAM13A</i>   | 21.22      | 2.84E-10 | chr4:89647106-90032549   | T                   | T              |
| <i>SNCA</i>     | 26.87      | 9.93E-13 | chr4:90645250-90759466   |                     | T              |
| <i>MAFK</i>     | 15.58      | 5.12E-08 | chr7:1570350-1582679     |                     |                |
| <i>CNPY4</i>    | 14.97      | 1.01E-07 | chr7:99717236-99723134   |                     | T              |
| <i>DEPTOR</i>   | 17.37      | 1.03E-08 | chr8:120885900-121063157 | T                   |                |
| <i>B4GALNT4</i> | 15.85      | 4.58E-08 | chr11:369795-382117      |                     | T              |
| <i>ANO9</i>     | 31.33      | 7.11E-15 | chr11:417930-442011      |                     | T              |
| <i>HRAS</i>     | 15.22      | 6.70E-08 | chr11:532242-537287      |                     |                |
| <i>LMNTD2</i>   | 15.87      | 7.04E-08 | chr11:554850-560779      |                     |                |
| <i>IRF7</i>     | 120.2      | 2.22E-11 | chr11:612553-615999      |                     | T              |
| <i>CDHR5</i>    | 28.26      | 4.36E-13 | chr11:616565-626078      |                     |                |
| <i>SCT</i>      | 83.37      | 1.09E-11 | chr11:626313-627173      |                     |                |
| <i>SLC25A22</i> | 454.56     | 2.36E-11 | chr11:790475-798316      |                     |                |
| <i>EFCAB4A</i>  | 19.81      | 8.39E-10 | chr11:826144-831991      |                     | T              |
| <i>BRSK2</i>    | 125.77     | 4.15E-10 | chr11:1411129-1483919    | T                   |                |
| <i>KRTAP5-1</i> | 77.98      | 2.50E-11 | chr11:1605572-1606513    |                     | T              |
| <i>CTSD</i>     | 106.87     | 4.09E-11 | chr11:1773982-1785222    |                     | T              |
| <i>PRR33</i>    | 488.77     | 1.98E-11 | chr11:1910375-1912084    |                     |                |
| <i>TNNT3</i>    | 26.57      | 6.56E-12 | chr11:1940792-1959936    |                     |                |
| <i>BMF</i>      | 133.41     | 1.83E-11 | chr15:40380091-40401093  |                     |                |
| <i>PAK6</i>     | 161.5      | 3.45E-08 | chr15:40509629-40569688  |                     |                |
| <i>BAHD1</i>    | 26.24      | 2.26E-12 | chr15:40731920-40760441  |                     |                |
| <i>AKAP13</i>   | 18.22      | 7.94E-09 | chr15:85923802-86292586  | T                   | T              |
| <i>GJC1</i>     | 23.99      | 1.09E-11 | chr17:42875816-42908184  |                     |                |
| <i>ARHGAP27</i> | 25.9       | 2.15E-12 | chr17:43471268-43511787  | T                   | T              |
| <i>PLEKHMI</i>  | 340.62     | 2.36E-11 | chr17:43513266-43568146  |                     | T              |
| <i>ARL17A</i>   | 16.71      | 1.18E-08 | chr17:43697710-43913194  |                     |                |
| <i>CRHR1</i>    | 23.95      | 2.71E-11 | chr17:43697710-43913194  | T                   |                |
| <i>MAPT</i>     | 305.78     | 2.06E-11 | chr17:43971748-44105700  | T                   |                |
| <i>LRRC37A</i>  | 667.77     | 2.27E-11 | chr17:44370099-44415160  | T                   |                |
| <i>WNT3</i>     | 347.42     | 4.12E-11 | chr17:44839872-44910520  |                     | T              |
| <i>WNT9B</i>    | 23.3       | 4.25E-11 | chr17:44910567-44964096  |                     | T              |
| <i>SEMA6B</i>   | 18.9       | 6.27E-09 | chr19:4542600-4559820    |                     | T              |

**S Table 5: Candidate genes from TWAS UTMOST**

| <b>Gene</b>     | <b>Functions</b>                                                                                                                                                                      | <b>Position(hg19)</b>          |
|-----------------|---------------------------------------------------------------------------------------------------------------------------------------------------------------------------------------|--------------------------------|
| <i>MAFK</i>     | a TF belonging to the small Maf proteins (sMaf). The Bach1-sMaf heterodimer regulates the heme oxygenase-1 (HMOX1) gene [22], which was found to be a down-regulated DEG of IPF [23]. | chr7:1,570,350 - 1,582,679     |
| <i>HRAS</i>     | belongs to the Ras oncogene family; HRAS mutations were detected in patients having lung cancer with IPF[24].                                                                         | chr11:532,242 - 537,287        |
| <i>LMNTD2</i>   | a protein coding gene.                                                                                                                                                                | <i>chr11:554,855 - 560,779</i> |
| <i>CDHR5</i>    | a novel mucin-like gene that is a member of the cadherin superfamily. Associated with many metabolic and some tumor growth-associated processes and pathways[25].                     | chr11:616,565 - 626,078        |
| <i>SCT</i>      | encodes a member of the glucagon family of peptides.                                                                                                                                  | chr11:626,431 - 627,143        |
| <i>SLC25A22</i> | encodes a mitochondrial glutamate carrier; significantly associated with IPF using TWAS analysis.                                                                                     | chr11:790,475 - 798,316        |
| <i>PRR33</i>    | a protein coding gene.                                                                                                                                                                | chr11:1,910,375 - 1,912,084    |
| <i>TNNT3</i>    | related to skeletal and muscular system development and function [26].                                                                                                                | chr11:1,940,792 - 1,959,936    |
| <i>BMF</i>      | belongs to the BCL2 protein family; act as an important mediator of cell death signaling pathways [27].                                                                               | chr15:40,380,091 - 40,401,093  |
| <i>PAK6</i>     | Inhibition of PAK6 led to reduction in cell proliferation, migration and invasion of the cigarette smoke treated cells [21].                                                          | chr15:40,509,629 - 40,569,688  |
| <i>BAHD1</i>    | related to chromatin binding and transcription cis-regulatory region binding                                                                                                          | chr15:40,731,920 – 40,760,441  |
| <i>GJC1</i>     | a protein component of gap junction; GJC1 hypermethylation was seen among a small subset of adenomas [28].                                                                            | chr17:42,875,816 - 42,908,184  |
| <i>ARL17A</i>   | encodes a protein of the ADP-ribosylation factor family; involves in multiple regulatory pathways relevant to human carcinogenesis [29].                                              | chr17:44,594,068 - 44,657,088  |

**S Table 6A: *MAFK* targeted gene set from ChIP-Atlas**

| Index     | Cell type Class       | Cell type | Tissue | Tissue diagnosis/lineage     |
|-----------|-----------------------|-----------|--------|------------------------------|
| SRX150731 | Blood                 | GM12878   | blood  | mesoderm                     |
| SRX186621 | Blood                 | GM12878   | blood  | mesoderm                     |
| SRX150370 | Uterus                | HeLa      | Cervix | Adenocarcinoma               |
| SRX150385 | Liver                 | Hep G2    | Liver  | Carcinoma Hepatocellular     |
| SRX150689 | Liver                 | Hep G2    | Liver  | Carcinoma Hepatocellular     |
| SRX150372 | Pluripotent stem cell | hESC H1   |        |                              |
| SRX150483 | Lung                  | IMR-90    | Lung   | Normal                       |
| SRX150391 | Blood                 | K-562     | Blood  | Leukemia Chronic Myelogenous |
| SRX150493 | Blood                 | K-562     | Blood  | Leukemia Chronic Myelogenous |
| ERX159255 | Digestive tract       | LoVo      | Colon  | Adenocarcinoma               |
| ERX159256 | Digestive tract       | LoVo      | Colon  | Adenocarcinoma               |
| SRX360026 | Digestive tract       | LoVo      | Colon  | Adenocarcinoma               |
| SRX298273 | Blood                 | OCI-LY-7  | Blood  | Lymphoma B-cell              |

**S Table 6B: *SMAD2* targeted gene set from ChIP-Atlas**

| Index      | Cell type Class       | Cell type                        | Tissue         | Tissue diagnosis/lineage |
|------------|-----------------------|----------------------------------|----------------|--------------------------|
| SRX3847778 | Cardiovascular        | Aortic_smooth_muscle_cells       |                |                          |
| SRX3847781 | Cardiovascular        | Aortic_smooth_muscle_cells       |                |                          |
| SRX6476497 | Cardiovascular        | Aortic_smooth_muscle_cells       |                |                          |
| SRX6476500 | Cardiovascular        | Aortic_smooth_muscle_cells       |                |                          |
| SRX702089  | Pluripotent stem cell | hESC_derived_ectodermal_cells    |                |                          |
| SRX064489  | Pluripotent stem cell | hESC_derived_mesendodermal_cells |                |                          |
| SRX064490  | Pluripotent stem cell | hESC_derived_mesendodermal_cells |                |                          |
| SRX084502  | Pluripotent stem cell | hESC_derived_mesendodermal_cells |                |                          |
| SRX084503  | Pluripotent stem cell | hESC_derived_mesendodermal_cells |                |                          |
| SRX702090  | Pluripotent stem cell | hESC_derived_mesendodermal_cells |                |                          |
| SRX702091  | Pluripotent stem cell | hESC_derived_mesendodermal_cells |                |                          |
| SRX2844311 | Pluripotent stem cell | hESC_H1                          |                |                          |
| SRX2844312 | Pluripotent stem cell | hESC_H1                          |                |                          |
| SRX064480  | Pluripotent stem cell | hESC_H9                          |                |                          |
| SRX064481  | Pluripotent stem cell | hESC_H9                          |                |                          |
| SRX084500  | Pluripotent stem cell | hESC_H9                          |                |                          |
| SRX084501  | Pluripotent stem cell | hESC_H9                          |                |                          |
| SRX702088  | Pluripotent stem cell | hESC_HUES64                      |                |                          |
| SRX3592677 | Pluripotent stem cell | hESC_HUES8                       |                |                          |
| SRX3592681 | Pluripotent stem cell | hESC_HUES8                       |                |                          |
| SRX3592685 | Pluripotent stem cell | hESC_HUES8                       |                |                          |
| SRX378126  | Pluripotent stem cell | hESC_WA09                        |                |                          |
| SRX378127  | Pluripotent stem cell | hESC_WA09                        |                |                          |
| SRX6957406 | Kidney                | HGrC1                            |                |                          |
| SRX6957412 | Kidney                | HGrC1                            |                |                          |
| SRX6957413 | Kidney                | HGrC1                            |                |                          |
| SRX6957414 | Kidney                | HGrC1                            |                |                          |
| SRX6957415 | Kidney                | HGrC1                            |                |                          |
| SRX6957436 | Kidney                | HGrC1                            |                |                          |
| SRX6957437 | Kidney                | HGrC1                            |                |                          |
| SRX6957486 | Kidney                | HGrC1                            |                |                          |
| SRX6957491 | Kidney                | HGrC1                            |                |                          |
| SRX6476489 | Cardiovascular        | HUVEC                            | Umbilical Cord | Normal                   |
| SRX6476492 | Cardiovascular        | HUVEC                            | Umbilical Cord | Normal                   |
| SRX6957479 | Gonad                 | KGN                              | Ovary          | Tumor Granulosa Cell     |
| SRX6957483 | Gonad                 | KGN                              | Ovary          | Tumor Granulosa Cell     |
| SRX2245587 | Pancreas              | PANC-1                           | Pancreas/Duct  | Epithelioid Carcinoma    |
| SRX2245588 | Pancreas              | PANC-1                           | Pancreas/Duct  | Epithelioid Carcinoma    |

**S Table 7: Partitioned heritability enrichment analysis of *MAFK* TF binding sites in IPF after MTAG**

| Tissue   | Cell Derivation | Trait               | Enrichment score | P value  |
|----------|-----------------|---------------------|------------------|----------|
| BLOOD    | B cell          | arm fat percentage  | 6.44             | 1.57E-05 |
| BLOOD    | B cell          | body fat percentage | 2.22             | 7.43E-05 |
| BLOOD    | B cell          | hip circumference   | 3.60             | 9.22E-05 |
| BLOOD    | B cell          | whole-body fat mass | 3.03             | 1.21E-04 |
| LUNG     | Fibroblast      | arm fat percentage  | 1.68             | 2.59E-07 |
| LUNG     | Fibroblast      | body fat percentage | 1.83             | 6.69E-07 |
| LUNG     | Fibroblast      | hip circumference   | 1.35             | 2.91E-06 |
| LUNG     | Fibroblast      | whole-body fat mass | 5.09             | 4.19E-05 |
| BLOOD    | Myeloid         | arm fat percentage  | 2.03             | 5.24E-04 |
| BLOOD    | Myeloid         | body fat percentage | 2.32             | 2.85E-03 |
| BLOOD    | Myeloid         | hip circumference   | 1.46             | 5.19E-04 |
| BLOOD    | Myeloid         | whole-body fat mass | 2.34             | 3.84E-03 |
| STEMCELL | Stem cell       | arm fat percentage  | 2.58             | 4.32E-05 |
| STEMCELL | Stem cell       | body fat percentage | 2.37             | 1.41E-04 |
| STEMCELL | Stem cell       | hip circumference   | 2.51             | 1.43E-04 |
| STEMCELL | Stem cell       | whole-body fat mass | 2.34             | 4.08E-04 |

**S Table 8A: Enrichment of *MAFK* targets in cell-type-specific differentially expressed genes in IPF single cell data. P values are adjusted using Bonferroni correction**

| Annotation       | # genes | Celltype            | P value  | Adjusted P value (Bonferroni) |
|------------------|---------|---------------------|----------|-------------------------------|
| SRX150483.IMR.90 | 64      | Myofibroblast       | 1.89E-50 | 8.45E-48                      |
| SRX150385.Hep_G2 | 55      | Macrophage          | 3.53E-49 | 1.58E-46                      |
| SRX150483.IMR.90 | 54      | Macrophage          | 2.95E-48 | 1.32E-45                      |
| SRX150385.Hep_G2 | 53      | Macrophage_Alveolar | 2.64E-45 | 1.18E-42                      |
| SRX150483.IMR.90 | 53      | Macrophage_Alveolar | 2.64E-45 | 1.18E-42                      |
| SRX150385.Hep_G2 | 66      | Ciliated            | 2.15E-41 | 9.63E-39                      |
| SRX150385.Hep_G2 | 44      | VE_Capillary_B      | 2.56E-40 | 1.15E-37                      |
| SRX150385.Hep_G2 | 51      | Myofibroblast       | 5.61E-40 | 2.51E-37                      |
| SRX150483.IMR.90 | 41      | VE_Capillary_B      | 1.60E-37 | 7.16E-35                      |
| SRX150689.Hep_G2 | 41      | Macrophage          | 2.03E-36 | 9.07E-34                      |
| SRX150391.K.562  | 41      | Macrophage          | 2.03E-36 | 9.07E-34                      |
| SRX150483.IMR.90 | 57      | Ciliated            | 1.15E-35 | 5.13E-33                      |
| SRX150370.HeLa   | 40      | Macrophage          | 1.61E-35 | 7.20E-33                      |
| SRX150483.IMR.90 | 38      | Fibroblast          | 4.51E-35 | 2.02E-32                      |
| SRX150385.Hep_G2 | 46      | ATII                | 5.75E-35 | 2.58E-32                      |
| SRX150483.IMR.90 | 44      | ATII                | 1.97E-33 | 8.81E-31                      |
| SRX150689.Hep_G2 | 38      | Macrophage_Alveolar | 2.60E-32 | 1.17E-29                      |
| SRX150391.K.562  | 38      | Macrophage_Alveolar | 2.60E-32 | 1.17E-29                      |
| SRX150385.Hep_G2 | 35      | Fibroblast          | 2.81E-32 | 1.26E-29                      |
| SRX150689.Hep_G2 | 41      | Myofibroblast       | 4.67E-32 | 2.09E-29                      |
| SRX150370.HeLa   | 50      | Ciliated            | 2.96E-31 | 1.33E-28                      |
| SRX150370.HeLa   | 36      | Macrophage_Alveolar | 1.33E-30 | 5.97E-28                      |
| SRX150689.Hep_G2 | 32      | VE_Capillary_B      | 3.18E-29 | 1.43E-26                      |
| SRX150385.Hep_G2 | 31      | ATI                 | 4.01E-29 | 1.80E-26                      |
| SRX150483.IMR.90 | 31      | ATI                 | 4.01E-29 | 1.80E-26                      |
| SRX150689.Hep_G2 | 44      | Ciliated            | 1.68E-27 | 7.54E-25                      |
| SRX150483.IMR.90 | 19      | ncMonocyte          | 1.14E-26 | 5.10E-24                      |
| SRX150385.Hep_G2 | 24      | Club                | 1.38E-26 | 6.19E-24                      |
| SRX150385.Hep_G2 | 20      | cMonocyte           | 2.97E-26 | 1.33E-23                      |
| SRX150370.HeLa   | 28      | VE_Capillary_B      | 1.41E-25 | 6.32E-23                      |
| SRX150483.IMR.90 | 19      | cMonocyte           | 6.13E-25 | 2.75E-22                      |
| SRX150391.K.562  | 27      | VE_Capillary_B      | 1.14E-24 | 5.11E-22                      |
| SRX150689.Hep_G2 | 31      | ATII                | 1.44E-23 | 6.47E-21                      |
| SRX150370.HeLa   | 30      | Myofibroblast       | 1.78E-23 | 7.99E-21                      |
| SRX150391.K.562  | 30      | Myofibroblast       | 1.78E-23 | 7.99E-21                      |
| SRX150689.Hep_G2 | 25      | Fibroblast          | 4.53E-23 | 2.03E-20                      |
| SRX150370.HeLa   | 30      | ATII                | 8.15E-23 | 3.65E-20                      |
| SRX150689.Hep_G2 | 24      | ATI                 | 1.41E-22 | 6.33E-20                      |
| SRX150391.K.562  | 36      | Ciliated            | 1.56E-22 | 6.97E-20                      |
| SRX150391.K.562  | 29      | ATII                | 4.59E-22 | 2.06E-19                      |
| SRX150370.HeLa   | 23      | Fibroblast          | 3.01E-21 | 1.35E-18                      |



| Annotation        | # genes | Celltype            | P value  | Adjusted P value (Bonferroni) |
|-------------------|---------|---------------------|----------|-------------------------------|
| SRX150385.Hep_G2  | 18      | cDC2                | 3.94E-21 | 1.76E-18                      |
| SRX150385.Hep_G2  | 15      | ncMonocyte          | 4.64E-21 | 2.08E-18                      |
| SRX150483.IMR.90  | 18      | Club                | 5.45E-20 | 2.44E-17                      |
| SRX150391.K.562   | 21      | ATI                 | 8.53E-20 | 3.82E-17                      |
| SRX150370.HeLa    | 15      | cMonocyte           | 1.01E-19 | 4.52E-17                      |
| SRX150391.K.562   | 15      | cMonocyte           | 1.01E-19 | 4.52E-17                      |
| SRX150370.HeLa    | 14      | ncMonocyte          | 1.14E-19 | 5.10E-17                      |
| SRX150391.K.562   | 14      | ncMonocyte          | 1.14E-19 | 5.10E-17                      |
| SRX150385.Hep_G2  | 14      | Lymphatic           | 1.82E-19 | 8.14E-17                      |
| SRX150483.IMR.90  | 14      | Lymphatic           | 1.82E-19 | 8.14E-17                      |
| SRX150370.HeLa    | 20      | ATI                 | 7.16E-19 | 3.21E-16                      |
| SRX150483.IMR.90  | 16      | cDC2                | 8.07E-19 | 3.62E-16                      |
| SRX150391.K.562   | 20      | Fibroblast          | 1.59E-18 | 7.11E-16                      |
| SRX150385.Hep_G2  | 13      | NK                  | 1.76E-18 | 7.91E-16                      |
| SRX150689.Hep_G2  | 14      | cMonocyte           | 1.98E-18 | 8.88E-16                      |
| SRX150385.Hep_G2  | 11      | VE_Venous           | 4.56E-18 | 2.04E-15                      |
| SRX298273.OCLLY.7 | 21      | Macrophage_Alveolar | 5.92E-18 | 2.65E-15                      |
| SRX150372.hESC_H1 | 19      | ATI                 | 5.98E-18 | 2.68E-15                      |
| SRX150372.hESC_H1 | 20      | Macrophage          | 7.66E-18 | 3.43E-15                      |
| SRX150385.Hep_G2  | 12      | T_Cytotoxic         | 1.59E-17 | 7.12E-15                      |
| SRX150372.hESC_H1 | 22      | Myofibroblast       | 2.57E-17 | 1.15E-14                      |
| SRX150689.Hep_G2  | 12      | Lymphatic           | 9.82E-17 | 4.40E-14                      |
| SRX150370.HeLa    | 14      | cDC2                | 1.61E-16 | 7.22E-14                      |
| SRX150483.IMR.90  | 10      | VE_Venous           | 1.89E-16 | 8.47E-14                      |
| SRX150385.Hep_G2  | 11      | T                   | 4.27E-16 | 1.91E-13                      |
| SRX150689.Hep_G2  | 11      | NK                  | 1.08E-15 | 4.82E-13                      |
| SRX150689.Hep_G2  | 14      | Club                | 1.21E-15 | 5.43E-13                      |
| SRX150689.Hep_G2  | 11      | ncMonocyte          | 1.56E-15 | 7.01E-13                      |
| SRX150372.hESC_H1 | 18      | Macrophage_Alveolar | 1.85E-15 | 8.28E-13                      |
| SRX150689.Hep_G2  | 13      | cDC2                | 2.26E-15 | 1.01E-12                      |
| SRX150391.K.562   | 13      | cDC2                | 2.26E-15 | 1.01E-12                      |
| SRX150372.hESC_H1 | 20      | ATII                | 2.36E-15 | 1.06E-12                      |
| SRX298273.OCLLY.7 | 17      | Macrophage          | 3.06E-15 | 1.37E-12                      |
| SRX150372.hESC_H1 | 24      | Ciliated            | 3.61E-15 | 1.62E-12                      |
| SRX150483.IMR.90  | 10      | T                   | 1.13E-14 | 5.08E-12                      |
| SRX150391.K.562   | 10      | T                   | 1.13E-14 | 5.08E-12                      |
| SRX150689.Hep_G2  | 10      | T_Cytotoxic         | 1.13E-14 | 5.08E-12                      |
| SRX150372.hESC_H1 | 15      | VE_Capillary_B      | 6.77E-14 | 3.03E-11                      |
| SRX150385.Hep_G2  | 7       | VE_Capillary_A      | 1.05E-13 | 4.69E-11                      |
| SRX150391.K.562   | 12      | Club                | 1.75E-13 | 7.83E-11                      |
| SRX150689.Hep_G2  | 9       | T                   | 2.97E-13 | 1.33E-10                      |
| SRX150391.K.562   | 9       | T_Cytotoxic         | 2.97E-13 | 1.33E-10                      |
| SRX150689.Hep_G2  | 8       | VE_Venous           | 3.06E-13 | 1.37E-10                      |

| Annotation        | # genes | Celltype            | P value  | Adjusted P value (Bonferroni) |
|-------------------|---------|---------------------|----------|-------------------------------|
| SRX150483.IMR.90  | 9       | NK                  | 6.27E-13 | 2.81E-10                      |
| SRX150483.IMR.90  | 5       | DC_Mature           | 2.98E-12 | 1.34E-09                      |
| SRX150385.Hep_G2  | 7       | B                   | 7.05E-12 | 3.16E-09                      |
| SRX150370.HeLa    | 8       | T                   | 7.69E-12 | 3.44E-09                      |
| SRX150370.HeLa    | 8       | T_Cytotoxic         | 7.69E-12 | 3.44E-09                      |
| SRX150391.K.562   | 7       | VE_Venous           | 1.20E-11 | 5.36E-09                      |
| SRX150370.HeLa    | 8       | NK                  | 1.49E-11 | 6.66E-09                      |
| SRX150391.K.562   | 8       | NK                  | 1.49E-11 | 6.66E-09                      |
| SRX298273.OCLLY.7 | 8       | ncMonocyte          | 1.94E-11 | 8.70E-09                      |
| SRX150370.HeLa    | 10      | Club                | 2.47E-11 | 1.10E-08                      |
| SRX298273.OCLLY.7 | 12      | VE_Capillary_B      | 3.09E-11 | 1.39E-08                      |
| SRX298273.OCLLY.7 | 14      | Myofibroblast       | 3.16E-11 | 1.42E-08                      |
| SRX186621.GM12878 | 12      | Macrophage          | 6.24E-11 | 2.80E-08                      |
| SRX150483.IMR.90  | 7       | T_Cytotoxic         | 1.96E-10 | 8.80E-08                      |
| SRX360026.LoVo    | 11      | VE_Capillary_B      | 2.37E-10 | 1.06E-07                      |
| SRX298273.OCLLY.7 | 16      | Ciliated            | 2.59E-10 | 1.16E-07                      |
| SRX150372.hESC_H1 | 7       | ncMonocyte          | 4.40E-10 | 1.97E-07                      |
| SRX150370.HeLa    | 6       | VE_Venous           | 4.59E-10 | 2.06E-07                      |
| SRX150689.Hep_G2  | 5       | VE_Capillary_A      | 6.40E-10 | 2.87E-07                      |
| SRX150483.IMR.90  | 5       | VE_Capillary_A      | 6.40E-10 | 2.87E-07                      |
| SRX150385.Hep_G2  | 5       | VE_Arterial         | 1.22E-09 | 5.48E-07                      |
| SRX150372.hESC_H1 | 10      | Fibroblast          | 1.49E-09 | 6.69E-07                      |
| SRX150372.hESC_H1 | 7       | cMonocyte           | 1.74E-09 | 7.81E-07                      |
| SRX298273.OCLLY.7 | 12      | ATII                | 1.86E-09 | 8.33E-07                      |
| SRX150483.IMR.90  | 4       | VE_Peribronchial    | 2.05E-09 | 9.20E-07                      |
| SRX360026.LoVo    | 10      | Macrophage          | 3.23E-09 | 1.45E-06                      |
| SRX150372.hESC_H1 | 8       | Club                | 3.40E-09 | 1.52E-06                      |
| SRX186621.GM12878 | 11      | Myofibroblast       | 5.84E-09 | 2.62E-06                      |
| SRX186621.GM12878 | 10      | Macrophage_Alveolar | 7.30E-09 | 3.27E-06                      |
| SRX298273.OCLLY.7 | 9       | ATI                 | 8.15E-09 | 3.65E-06                      |
| SRX150370.HeLa    | 5       | B                   | 1.19E-08 | 5.34E-06                      |
| SRX150689.Hep_G2  | 5       | B                   | 1.19E-08 | 5.34E-06                      |
| SRX150372.hESC_H1 | 5       | B                   | 1.19E-08 | 5.34E-06                      |
| SRX150483.IMR.90  | 5       | B                   | 1.19E-08 | 5.34E-06                      |
| SRX150391.K.562   | 5       | B                   | 1.19E-08 | 5.34E-06                      |
| SRX150391.K.562   | 6       | Lymphatic           | 1.19E-08 | 5.35E-06                      |
| SRX186621.GM12878 | 9       | VE_Capillary_B      | 1.37E-08 | 6.14E-06                      |
| SRX150385.Hep_G2  | 4       | B_Plasma            | 1.60E-08 | 7.16E-06                      |
| SRX150689.Hep_G2  | 4       | B_Plasma            | 1.60E-08 | 7.16E-06                      |
| SRX298273.OCLLY.7 | 4       | B_Plasma            | 1.60E-08 | 7.16E-06                      |
| SRX298273.OCLLY.7 | 6       | cMonocyte           | 3.19E-08 | 1.43E-05                      |
| SRX150391.K.562   | 4       | VE_Capillary_A      | 4.73E-08 | 2.12E-05                      |
| SRX360026.LoVo    | 9       | Macrophage_Alveolar | 4.82E-08 | 2.16E-05                      |

| Annotation         | # genes | Celltype         | P value  | Adjusted P value (Bonferroni) |
|--------------------|---------|------------------|----------|-------------------------------|
| SRX360026.LoVo     | 9       | Myofibroblast    | 1.87E-07 | 8.39E-05                      |
| SRX150372.hESC_H1  | 6       | cDC2             | 1.98E-07 | 8.87E-05                      |
| SRX298273.OCL.LY.7 | 6       | cDC2             | 1.98E-07 | 8.87E-05                      |
| SRX150493.K.562    | 11      | Ciliated         | 2.67E-07 | 0.00011983                    |
| SRX186621.GM12878  | 9       | ATII             | 2.92E-07 | 0.00013062                    |
| SRX150385.Hep_G2   | 3       | VE_Peribronchial | 3.42E-07 | 0.00015311                    |
| SRX186621.GM12878  | 7       | ATI              | 5.24E-07 | 0.00023463                    |
| ERX159256.LoVo     | 7       | VE_Capillary_B   | 7.84E-07 | 0.00035115                    |
| SRX150385.Hep_G2   | 3       | Basal            | 9.99E-07 | 0.00044755                    |
| SRX150689.Hep_G2   | 3       | Basal            | 9.99E-07 | 0.00044755                    |
| SRX150483.IMR.90   | 3       | Basal            | 9.99E-07 | 0.00044755                    |
| SRX150391.K.562    | 3       | Basal            | 9.99E-07 | 0.00044755                    |
| SRX186621.GM12878  | 10      | Ciliated         | 1.07E-06 | 0.00047787                    |
| SRX186621.GM12878  | 3       | B_Plasma         | 1.52E-06 | 0.00068109                    |
| SRX150370.HeLa     | 3       | B_Plasma         | 1.52E-06 | 0.00068109                    |
| SRX150372.hESC_H1  | 3       | B_Plasma         | 1.52E-06 | 0.00068109                    |
| SRX150483.IMR.90   | 3       | B_Plasma         | 1.52E-06 | 0.00068109                    |
| SRX150372.hESC_H1  | 4       | T                | 3.05E-06 | 0.00136475                    |
| SRX298273.OCL.LY.7 | 4       | T                | 3.05E-06 | 0.00136475                    |
| SRX360026.LoVo     | 6       | ATI              | 4.18E-06 | 0.0018714                     |
| SRX150731.GM12878  | 9       | Ciliated         | 4.25E-06 | 0.00190286                    |
| SRX186621.GM12878  | 4       | ncMonocyte       | 4.79E-06 | 0.00214577                    |
| SRX360026.LoVo     | 4       | ncMonocyte       | 4.79E-06 | 0.00214577                    |
| SRX150689.Hep_G2   | 3       | VE_Arterial      | 4.92E-06 | 0.00220242                    |
| SRX150483.IMR.90   | 3       | VE_Arterial      | 4.92E-06 | 0.00220242                    |
| SRX150391.K.562    | 3       | VE_Arterial      | 4.92E-06 | 0.00220242                    |
| SRX298273.OCL.LY.7 | 6       | Fibroblast       | 5.27E-06 | 0.00236041                    |
| SRX150370.HeLa     | 4       | Lymphatic        | 5.43E-06 | 0.00243475                    |
| SRX298273.OCL.LY.7 | 4       | Lymphatic        | 5.43E-06 | 0.00243475                    |
| SRX150493.K.562    | 6       | Macrophage       | 8.35E-06 | 0.00373943                    |
| ERX159256.LoVo     | 6       | Macrophage       | 8.35E-06 | 0.00373943                    |
| SRX298273.OCL.LY.7 | 3       | B                | 1.86E-05 | 0.00834666                    |
| SRX150372.hESC_H1  | 3       | VE_Venous        | 2.32E-05 | 0.01038319                    |
| SRX150385.Hep_G2   | 2       | DC_Mature        | 3.30E-05 | 0.0147914                     |
| SRX150391.K.562    | 2       | DC_Mature        | 3.30E-05 | 0.0147914                     |
| SRX298273.OCL.LY.7 | 2       | DC_Mature        | 3.30E-05 | 0.0147914                     |
| ERX159256.LoVo     | 5       | ATI              | 3.32E-05 | 0.01487428                    |
| SRX186621.GM12878  | 5       | Fibroblast       | 4.03E-05 | 0.01804221                    |
| SRX150493.K.562    | 6       | ATII             | 4.48E-05 | 0.02008729                    |
| SRX360026.LoVo     | 6       | ATII             | 4.48E-05 | 0.02008729                    |
| SRX150370.HeLa     | 2       | VE_Peribronchial | 5.25E-05 | 0.02353177                    |
| SRX150391.K.562    | 2       | VE_Peribronchial | 5.25E-05 | 0.02353177                    |
| SRX298273.OCL.LY.7 | 2       | VE_Peribronchial | 5.25E-05 | 0.02353177                    |

| Annotation        | # genes | Celltype            | P value    | Adjusted P value (Bonferroni) |
|-------------------|---------|---------------------|------------|-------------------------------|
| ERX159255.LoVo    | 5       | Macrophage          | 5.91E-05   | 0.02645445                    |
| SRX186621.GM12878 | 4       | Club                | 6.08E-05   | 0.02725246                    |
| SRX360026.LoVo    | 4       | Club                | 6.08E-05   | 0.02725246                    |
| SRX298273.OCLLY.7 | 4       | Club                | 6.08E-05   | 0.02725246                    |
| SRX150372.hESC_H1 | 3       | T_Cytotoxic         | 7.42E-05   | 0.03323656                    |
| SRX360026.LoVo    | 3       | T_Cytotoxic         | 7.42E-05   | 0.03323656                    |
| SRX150493.K.562   | 5       | Macrophage_Alveolar | 8.85E-05   | 0.03963426                    |
| ERX159256.LoVo    | 5       | Macrophage_Alveolar | 8.85E-05   | 0.03963426                    |
| SRX150372.hESC_H1 | 3       | NK                  | 9.43E-05   | 0.04225825                    |
| SRX360026.LoVo    | 3       | NK                  | 9.43E-05   | 0.04225825                    |
| ERX159256.LoVo    | 3       | ncMonocyte          | 0.00010397 | 0.04657728                    |
| SRX150370.HeLa    | 2       | Basal               | 0.00010505 | 0.04706353                    |
| SRX150372.hESC_H1 | 2       | Basal               | 0.00010505 | 0.04706353                    |

**S Table 8B: Enrichment of *SMAD2* targets in cell-type-specific differentially expressed genes in IPF single cell data. P values are adjusted using Bonferroni correction**

| Annotation            | # genes | Celltype            | P value   | Adjusted P value (Bonferroni) |
|-----------------------|---------|---------------------|-----------|-------------------------------|
| SRX6476489.HUVEC      | 139     | VE_Capillary_B      | 3.14E-138 | 3.92E-135                     |
| SRX6476489.HUVEC      | 127     | Myofibroblast       | 2.22E-104 | 2.77E-101                     |
| SRX6476489.HUVEC      | 114     | Macrophage_Alveolar | 8.64E-102 | 1.08E-98                      |
| SRX6476489.HUVEC      | 107     | Macrophage          | 1.38E-99  | 1.72E-96                      |
| SRX6476489.HUVEC      | 122     | ATII                | 9.17E-97  | 1.14E-93                      |
| SRX6476489.HUVEC      | 80      | Fibroblast          | 6.86E-76  | 8.56E-73                      |
| SRX6476489.HUVEC      | 78      | ATI                 | 2.08E-75  | 2.60E-72                      |
| SRX6476489.HUVEC      | 104     | Ciliated            | 2.88E-66  | 3.60E-63                      |
| SRX6476489.HUVEC      | 41      | Lymphatic           | 1.60E-58  | 1.99E-55                      |
| SRX6476489.HUVEC      | 42      | cDC2                | 7.53E-50  | 9.40E-47                      |
| SRX6476489.HUVEC      | 37      | cMonocyte           | 2.63E-49  | 3.28E-46                      |
| SRX6476489.HUVEC      | 33      | T                   | 5.30E-49  | 6.62E-46                      |
| SRX6476489.HUVEC      | 34      | ncMonocyte          | 1.57E-48  | 1.96E-45                      |
| SRX6476489.HUVEC      | 38      | Club                | 2.40E-42  | 3.00E-39                      |
| SRX064481.hESC_H9     | 39      | ATI                 | 1.04E-36  | 1.30E-33                      |
| SRX6476489.HUVEC      | 25      | T_Cytotoxic         | 1.17E-36  | 1.46E-33                      |
| SRX064481.hESC_H9     | 37      | Macrophage          | 7.86E-33  | 9.81E-30                      |
| SRX6476489.HUVEC      | 16      | VE_Capillary_A      | 1.02E-31  | 1.27E-28                      |
| SRX6476489.HUVEC      | 19      | VE_Venous           | 2.39E-31  | 2.99E-28                      |
| SRX064481.hESC_H9     | 39      | Myofibroblast       | 1.74E-30  | 2.17E-27                      |
| SRX6476489.HUVEC      | 21      | NK                  | 7.75E-30  | 9.67E-27                      |
| SRX3592685.hESC_HUES8 | 33      | Macrophage          | 2.89E-29  | 3.60E-26                      |
| SRX064481.hESC_H9     | 38      | ATII                | 7.40E-29  | 9.24E-26                      |
| SRX064481.hESC_H9     | 46      | Ciliated            | 9.49E-29  | 1.18E-25                      |
| SRX064481.hESC_H9     | 31      | VE_Capillary_B      | 2.61E-28  | 3.26E-25                      |
| SRX3592685.hESC_HUES8 | 37      | ATII                | 4.25E-28  | 5.30E-25                      |
| SRX064481.hESC_H9     | 33      | Macrophage_Alveolar | 4.76E-28  | 5.95E-25                      |
| SRX3592685.hESC_HUES8 | 33      | Macrophage_Alveolar | 4.76E-28  | 5.95E-25                      |
| SRX064481.hESC_H9     | 28      | Fibroblast          | 8.14E-26  | 1.02E-22                      |
| SRX064481.hESC_H9     | 23      | Club                | 1.76E-25  | 2.20E-22                      |
| SRX3592685.hESC_HUES8 | 27      | ATI                 | 2.26E-25  | 2.82E-22                      |
| SRX6476492.HUVEC      | 29      | Macrophage_Alveolar | 1.16E-24  | 1.44E-21                      |
| SRX6476489.HUVEC      | 13      | VE_Arterial         | 1.17E-24  | 1.46E-21                      |
| SRX3592685.hESC_HUES8 | 31      | Myofibroblast       | 3.00E-24  | 3.74E-21                      |
| SRX6476492.HUVEC      | 26      | Macrophage          | 4.39E-23  | 5.47E-20                      |
| SRX3592685.hESC_HUES8 | 24      | VE_Capillary_B      | 5.90E-22  | 7.37E-19                      |
| SRX2844312.hESC_H1    | 22      | ATI                 | 1.01E-20  | 1.26E-17                      |
| SRX3592685.hESC_HUES8 | 33      | Ciliated            | 1.10E-20  | 1.38E-17                      |
| SRX2844312.hESC_H1    | 24      | ATII                | 2.51E-18  | 3.13E-15                      |
| SRX3592681.hESC_HUES8 | 24      | ATII                | 2.51E-18  | 3.13E-15                      |
| SRX6957437.HGrC1      | 19      | Fibroblast          | 1.27E-17  | 1.59E-14                      |
| SRX6476492.HUVEC      | 19      | VE_Capillary_B      | 1.83E-17  | 2.29E-14                      |
| SRX2844312.hESC_H1    | 22      | Myofibroblast       | 2.57E-17  | 3.20E-14                      |
| SRX6476492.HUVEC      | 22      | Myofibroblast       | 2.57E-17  | 3.20E-14                      |

| Annotation            | # genes | Celltype         | P value  | Adjusted P value (Bonferroni) |
|-----------------------|---------|------------------|----------|-------------------------------|
| SRX064481.hESC_H9     | 13      | cMonocyte        | 3.86E-17 | 4.82E-14                      |
| SRX2844312.hESC_H1    | 18      | VE_Capillary_B   | 1.44E-16 | 1.79E-13                      |
| SRX6957437.HGrC1      | 21      | Myofibroblast    | 1.49E-16 | 1.86E-13                      |
| SRX064481.hESC_H9     | 14      | cDC2             | 1.61E-16 | 2.01E-13                      |
| SRX6476492.HUVEC      | 21      | ATII             | 4.27E-16 | 5.33E-13                      |
| SRX064481.hESC_H9     | 11      | Lymphatic        | 2.24E-15 | 2.80E-12                      |
| SRX3592685.hESC_HUES8 | 11      | Lymphatic        | 2.24E-15 | 2.80E-12                      |
| SRX6476489.HUVEC      | 9       | B                | 3.84E-15 | 4.79E-12                      |
| SRX6957437.HGrC1      | 16      | VE_Capillary_B   | 8.73E-15 | 1.09E-11                      |
| SRX3592685.hESC_HUES8 | 10      | T                | 1.13E-14 | 1.42E-11                      |
| SRX3592677.hESC_HUES8 | 19      | ATII             | 1.30E-14 | 1.62E-11                      |
| SRX6476489.HUVEC      | 7       | B_Plasma         | 1.38E-14 | 1.72E-11                      |
| SRX3592685.hESC_HUES8 | 13      | Club             | 1.46E-14 | 1.82E-11                      |
| SRX6476492.HUVEC      | 23      | Ciliated         | 1.47E-14 | 1.83E-11                      |
| SRX6957437.HGrC1      | 15      | ATI              | 2.81E-14 | 3.51E-11                      |
| SRX064481.hESC_H9     | 10      | ncMonocyte       | 3.66E-14 | 4.57E-11                      |
| SRX3592685.hESC_HUES8 | 15      | Fibroblast       | 5.08E-14 | 6.34E-11                      |
| SRX6476492.HUVEC      | 15      | Fibroblast       | 5.08E-14 | 6.34E-11                      |
| SRX2844312.hESC_H1    | 15      | Macrophage       | 1.64E-13 | 2.04E-10                      |
| SRX3592681.hESC_HUES8 | 17      | Myofibroblast    | 1.67E-13 | 2.09E-10                      |
| SRX3592685.hESC_HUES8 | 10      | cMonocyte        | 2.70E-13 | 3.37E-10                      |
| SRX6476492.HUVEC      | 10      | cMonocyte        | 2.70E-13 | 3.37E-10                      |
| SRX2844312.hESC_H1    | 9       | T                | 2.97E-13 | 3.71E-10                      |
| SRX064481.hESC_H9     | 9       | T                | 2.97E-13 | 3.71E-10                      |
| SRX064481.hESC_H9     | 9       | T_Cytotoxic      | 2.97E-13 | 3.71E-10                      |
| SRX6957437.HGrC1      | 17      | ATII             | 3.90E-13 | 4.86E-10                      |
| SRX2844312.hESC_H1    | 14      | Fibroblast       | 4.00E-13 | 5.00E-10                      |
| SRX3592685.hESC_HUES8 | 9       | ncMonocyte       | 8.48E-13 | 1.06E-09                      |
| SRX3592681.hESC_HUES8 | 14      | Macrophage       | 1.19E-12 | 1.49E-09                      |
| SRX3592677.hESC_HUES8 | 13      | ATI              | 1.89E-12 | 2.36E-09                      |
| SRX3592681.hESC_HUES8 | 13      | Fibroblast       | 3.15E-12 | 3.93E-09                      |
| SRX064480.hESC_H9     | 13      | VE_Capillary_B   | 4.03E-12 | 5.03E-09                      |
| SRX3592685.hESC_HUES8 | 10      | cDC2             | 5.94E-12 | 7.42E-09                      |
| SRX6476489.HUVEC      | 5       | VE_Peribronchial | 1.13E-11 | 1.41E-08                      |
| SRX3592681.hESC_HUES8 | 12      | VE_Capillary_B   | 3.09E-11 | 3.86E-08                      |
| SRX3592677.hESC_HUES8 | 14      | Myofibroblast    | 3.16E-11 | 3.94E-08                      |
| SRX3592677.hESC_HUES8 | 12      | Macrophage       | 6.24E-11 | 7.79E-08                      |
| SRX6957437.HGrC1      | 17      | Ciliated         | 6.44E-11 | 8.04E-08                      |
| SRX064480.hESC_H9     | 11      | ATI              | 1.25E-10 | 1.56E-07                      |
| SRX3592677.hESC_HUES8 | 11      | Fibroblast       | 1.92E-10 | 2.40E-07                      |
| SRX064480.hESC_H9     | 7       | T                | 1.96E-10 | 2.45E-07                      |
| SRX3592681.hESC_HUES8 | 7       | T                | 1.96E-10 | 2.45E-07                      |
| SRX3592685.hESC_HUES8 | 7       | T_Cytotoxic      | 1.96E-10 | 2.45E-07                      |
| SRX2844312.hESC_H1    | 16      | Ciliated         | 2.59E-10 | 3.24E-07                      |
| SRX064481.hESC_H9     | 7       | NK               | 3.49E-10 | 4.35E-07                      |
| SRX3592685.hESC_HUES8 | 7       | NK               | 3.49E-10 | 4.35E-07                      |
| SRX3592681.hESC_HUES8 | 7       | ncMonocyte       | 4.40E-10 | 5.49E-07                      |

| Annotation            | # genes | Celltype            | P value  | Adjusted P value (Bonferroni) |
|-----------------------|---------|---------------------|----------|-------------------------------|
| SRX6476492.HUVEC      | 7       | ncMonocyte          | 4.40E-10 | 5.49E-07                      |
| SRX064480.hESC_H9     | 11      | Macrophage          | 4.50E-10 | 5.61E-07                      |
| SRX6957437.HGrC1      | 6       | VE_Venous           | 4.59E-10 | 5.73E-07                      |
| SRX2844312.hESC_H1    | 7       | Lymphatic           | 5.50E-10 | 6.87E-07                      |
| SRX6476489.HUVEC      | 4       | DC_Mature           | 7.45E-10 | 9.29E-07                      |
| SRX3592681.hESC_HUES8 | 10      | ATI                 | 1.01E-09 | 1.26E-06                      |
| SRX6476492.HUVEC      | 10      | ATI                 | 1.01E-09 | 1.26E-06                      |
| SRX064480.hESC_H9     | 12      | Myofibroblast       | 1.03E-09 | 1.28E-06                      |
| SRX3592681.hESC_HUES8 | 15      | Ciliated            | 1.04E-09 | 1.30E-06                      |
| SRX2844312.hESC_H1    | 11      | Macrophage_Alveolar | 1.10E-09 | 1.38E-06                      |
| SRX6957437.HGrC1      | 5       | VE_Arterial         | 1.22E-09 | 1.53E-06                      |
| SRX3592677.hESC_HUES8 | 10      | VE_Capillary_B      | 1.80E-09 | 2.25E-06                      |
| SRX6957437.HGrC1      | 10      | Macrophage          | 3.23E-09 | 4.03E-06                      |
| SRX2844312.hESC_H1    | 8       | Club                | 3.40E-09 | 4.25E-06                      |
| SRX3592677.hESC_HUES8 | 6       | T                   | 4.96E-09 | 6.19E-06                      |
| SRX6957437.HGrC1      | 6       | T                   | 4.96E-09 | 6.19E-06                      |
| SRX6476492.HUVEC      | 6       | T                   | 4.96E-09 | 6.19E-06                      |
| SRX2844312.hESC_H1    | 6       | T_Cytotoxic         | 4.96E-09 | 6.19E-06                      |
| SRX3592681.hESC_HUES8 | 6       | T_Cytotoxic         | 4.96E-09 | 6.19E-06                      |
| SRX6476492.HUVEC      | 6       | T_Cytotoxic         | 4.96E-09 | 6.19E-06                      |
| SRX6957437.HGrC1      | 10      | Macrophage_Alveolar | 7.30E-09 | 9.12E-06                      |
| SRX3592681.hESC_HUES8 | 6       | NK                  | 8.08E-09 | 1.01E-05                      |
| SRX6476492.HUVEC      | 6       | NK                  | 8.08E-09 | 1.01E-05                      |
| SRX3592681.hESC_HUES8 | 6       | Lymphatic           | 1.19E-08 | 1.49E-05                      |
| SRX064480.hESC_H9     | 13      | Ciliated            | 1.67E-08 | 2.09E-05                      |
| SRX2844312.hESC_H1    | 5       | VE_Venous           | 1.73E-08 | 2.16E-05                      |
| SRX064481.hESC_H9     | 5       | VE_Venous           | 1.73E-08 | 2.16E-05                      |
| SRX3592677.hESC_HUES8 | 6       | cMonocyte           | 3.19E-08 | 3.98E-05                      |
| SRX3592681.hESC_HUES8 | 6       | cMonocyte           | 3.19E-08 | 3.98E-05                      |
| SRX6476492.HUVEC      | 7       | Club                | 3.97E-08 | 4.95E-05                      |
| SRX064481.hESC_H9     | 4       | VE_Capillary_A      | 4.73E-08 | 5.91E-05                      |
| SRX6476489.HUVEC      | 3       | Goblet              | 6.31E-08 | 7.87E-05                      |
| SRX3592677.hESC_HUES8 | 12      | Ciliated            | 6.70E-08 | 8.36E-05                      |
| SRX064480.hESC_H9     | 8       | Fibroblast          | 8.93E-08 | 0.0001142                     |
| SRX6957437.HGrC1      | 5       | T_Cytotoxic         | 1.24E-07 | 0.00015428                    |
| SRX6476489.HUVEC      | 3       | cDC1                | 1.24E-07 | 0.00015467                    |
| SRX2844312.hESC_H1    | 5       | NK                  | 1.85E-07 | 0.0002313                     |
| SRX3592677.hESC_HUES8 | 5       | NK                  | 1.85E-07 | 0.0002313                     |
| SRX3592681.hESC_HUES8 | 6       | cDC2                | 1.98E-07 | 0.00024703                    |
| SRX6476492.HUVEC      | 6       | cDC2                | 1.98E-07 | 0.00024703                    |
| SRX2844312.hESC_H1    | 5       | ncMonocyte          | 2.18E-07 | 0.00027252                    |
| SRX064480.hESC_H9     | 5       | ncMonocyte          | 2.18E-07 | 0.00027252                    |
| SRX6476492.HUVEC      | 5       | Lymphatic           | 2.56E-07 | 0.00031942                    |
| SRX064480.hESC_H9     | 9       | ATII                | 2.92E-07 | 0.00036388                    |
| SRX064480.hESC_H9     | 8       | Macrophage_Alveolar | 3.17E-07 | 0.00039512                    |
| SRX3592681.hESC_HUES8 | 8       | Macrophage_Alveolar | 3.17E-07 | 0.00039512                    |

| Annotation                                 | # genes | Celltype            | P value  | Adjusted P value (Bonferroni) |
|--------------------------------------------|---------|---------------------|----------|-------------------------------|
| SRX2844312.hESC_H1                         | 5       | cMonocyte           | 5.78E-07 | 0.00072187                    |
| SRX064480.hESC_H9                          | 5       | cMonocyte           | 5.78E-07 | 0.00072187                    |
| SRX3592685.hESC_HUES8                      | 4       | VE_Venous           | 6.38E-07 | 0.00079662                    |
| SRX064490.hESC_derived_mesendodermal_cells | 7       | VE_Capillary_B      | 7.84E-07 | 0.0009782                     |
| SRX6476489.HUVEC                           | 3       | T_Regulatory        | 1.16E-06 | 0.0014436                     |
| SRX2844311.hESC_H1                         | 7       | Macrophage          | 1.18E-06 | 0.00146799                    |
| SRX2844311.hESC_H1                         | 7       | Macrophage_Alveolar | 2.08E-06 | 0.00259036                    |
| SRX3592677.hESC_HUES8                      | 7       | Macrophage_Alveolar | 2.08E-06 | 0.00259036                    |
| SRX2844312.hESC_H1                         | 5       | cDC2                | 2.63E-06 | 0.0032855                     |
| SRX064480.hESC_H9                          | 5       | cDC2                | 2.63E-06 | 0.0032855                     |
| SRX6957437.HGrC1                           | 5       | cDC2                | 2.63E-06 | 0.0032855                     |
| SRX064480.hESC_H9                          | 4       | T_Cytotoxic         | 3.05E-06 | 0.00380179                    |
| SRX3592677.hESC_HUES8                      | 4       | T_Cytotoxic         | 3.05E-06 | 0.00380179                    |
| SRX6957437.HGrC1                           | 3       | VE_Capillary_A      | 3.38E-06 | 0.00421364                    |
| SRX2844311.hESC_H1                         | 6       | ATI                 | 4.18E-06 | 0.00521319                    |
| SRX6957437.HGrC1                           | 4       | NK                  | 4.20E-06 | 0.00524638                    |
| SRX3592677.hESC_HUES8                      | 4       | ncMonocyte          | 4.79E-06 | 0.00597751                    |
| SRX6957491.HGrC1                           | 3       | VE_Arterial         | 4.92E-06 | 0.00613532                    |
| SRX3592677.hESC_HUES8                      | 5       | Club                | 5.30E-06 | 0.00661806                    |
| SRX3592681.hESC_HUES8                      | 5       | Club                | 5.30E-06 | 0.00661806                    |
| SRX6957437.HGrC1                           | 5       | Club                | 5.30E-06 | 0.00661806                    |
| SRX6957437.HGrC1                           | 4       | Lymphatic           | 5.43E-06 | 0.00678252                    |
| SRX2844311.hESC_H1                         | 6       | VE_Capillary_B      | 5.90E-06 | 0.00736051                    |
| SRX2844311.hESC_H1                         | 7       | Myofibroblast       | 5.95E-06 | 0.00742512                    |
| SRX064490.hESC_derived_mesendodermal_cells | 6       | Macrophage          | 8.35E-06 | 0.01041697                    |
| SRX6957437.HGrC1                           | 2       | Goblet              | 1.80E-05 | 0.02247524                    |
| SRX064481.hESC_H9                          | 3       | B                   | 1.86E-05 | 0.02325141                    |
| SRX3592677.hESC_HUES8                      | 3       | VE_Venous           | 2.32E-05 | 0.02892459                    |
| SRX064490.hESC_derived_mesendodermal_cells | 6       | Myofibroblast       | 3.34E-05 | 0.04170616                    |



**S Table 9: Study information of GWAS summary statistics**

| Trait                        | Abbrev   | Sample size | Reference                                                                                                                                                                     |
|------------------------------|----------|-------------|-------------------------------------------------------------------------------------------------------------------------------------------------------------------------------|
| Alcoholism                   | DrnkWk   | 537349      | <a href="https://www.nature.com/articles/s41588-018-0307-5">https://www.nature.com/articles/s41588-018-0307-5</a>                                                             |
| Alzheimer's Disease          | AD       | 63926       | <a href="https://www.niagads.org/igap-rv-summary-stats-kunkle-p-value-data">https://www.niagads.org/igap-rv-summary-stats-kunkle-p-value-data</a>                             |
| Anorexia Nervosa             | AN       | 72517       | <a href="https://www.nature.com/articles/s41588-019-0439-2">https://www.nature.com/articles/s41588-019-0439-2</a>                                                             |
| Anxiety Disorder             | ADs      | 31890       | <a href="https://jamanetwork.com/journals/jamapsychiatry/fullarticle/2733149">https://jamanetwork.com/journals/jamapsychiatry/fullarticle/2733149</a>                         |
| Asthma                       | asthma   | 127669      | <a href="https://www.nature.com/articles/s41588-017-0014-7">https://www.nature.com/articles/s41588-017-0014-7</a>                                                             |
| Bipolar Disorder             | BD       | 51710       | <a href="https://www.nature.com/articles/s41588-019-0397-8">https://www.nature.com/articles/s41588-019-0397-8</a>                                                             |
| Body Mass Index              | BMI      | 795640      | <a href="https://academic.oup.com/hmg/article/27/20/3641/5067845">https://academic.oup.com/hmg/article/27/20/3641/5067845</a>                                                 |
| Breast Cancer                | BC       | 228951      | <a href="https://www.nature.com/articles/nature24284">https://www.nature.com/articles/nature24284</a>                                                                         |
| Chronic Kidney Disease       | CKD      | 118147      | <a href="https://www.nature.com/articles/ncomms10023">https://www.nature.com/articles/ncomms10023</a>                                                                         |
| Crohn's Disease              | Crohn    | 40266       | <a href="https://www.nature.com/articles/ng.3760">https://www.nature.com/articles/ng.3760</a>                                                                                 |
| Epilepsy                     | epilepsy | 34853       | <a href="https://www.sciencedirect.com/science/article/pii/S1474442214701711?via%3Dihub">https://www.sciencedirect.com/science/article/pii/S1474442214701711?via%3Dihub</a>   |
| HDL Cholesterol              | HDL      | 99900       | <a href="https://www.nature.com/articles/nature09270">https://www.nature.com/articles/nature09270</a>                                                                         |
| Height                       | Height   | 709706      | <a href="https://academic.oup.com/hmg/article/27/20/3641/5067845">https://academic.oup.com/hmg/article/27/20/3641/5067845</a>                                                 |
| Inflammatory Bowel Disease   | IBD      | 59957       | <a href="https://www.nature.com/articles/ng.3760">https://www.nature.com/articles/ng.3760</a>                                                                                 |
| Insomnia                     | Insomnia | 113006      | <a href="https://www.nature.com/articles/ng.3888">https://www.nature.com/articles/ng.3888</a>                                                                                 |
| Ischaemic Stroke             | IS       | 29633       | <a href="https://n.neurology.org/content/86/13/1217.long">https://n.neurology.org/content/86/13/1217.long</a>                                                                 |
| LDL Cholesterol              | LDL      | 95454       | <a href="https://www.nature.com/articles/nature09270">https://www.nature.com/articles/nature09270</a>                                                                         |
| Lung Cancer                  | LC       | 85716       | <a href="https://pubmed.ncbi.nlm.nih.gov/28604730/">https://pubmed.ncbi.nlm.nih.gov/28604730/</a>                                                                             |
| Major Depressive Disorder    | MDD      | 500199      | <a href="http://dx.doi.org/10.1038/s41593-018-0326-7">http://dx.doi.org/10.1038/s41593-018-0326-7</a>                                                                         |
| Neuroticism                  | NSM      | 170911      | <a href="https://www.nature.com/articles/ng.3552">https://www.nature.com/articles/ng.3552</a>                                                                                 |
| Parkinson's Disease          | PD       | 482730      | <a href="https://www.biorxiv.org/content/10.1101/388165v3">https://www.biorxiv.org/content/10.1101/388165v3</a>                                                               |
| Primary Biliary Cirrhosis    | PBC      | 13239       | <a href="https://www.nature.com/articles/ncomms9019">https://www.nature.com/articles/ncomms9019</a>                                                                           |
| Resting Heart Rate           | RHR      | 134251      | <a href="http://dx.doi.org/10.1038/ng.3708">http://dx.doi.org/10.1038/ng.3708</a>                                                                                             |
| Rheumatoid Arthritis         | RA       | 58284       | <a href="https://www.nature.com/articles/nature12873">https://www.nature.com/articles/nature12873</a>                                                                         |
| Schizophrenia                | SCZ      | 105318      | <a href="https://www.nature.com/articles/s41588-018-0059-2">https://www.nature.com/articles/s41588-018-0059-2</a>                                                             |
| Sleep Duration               | SD       | 127573      | <a href="https://journals.plos.org/plosgenetics/article?id=10.1371/journal.pgen.1006125">https://journals.plos.org/plosgenetics/article?id=10.1371/journal.pgen.1006125</a>   |
| Systemic Lupus Erythematosus | SLE      | 14267       | <a href="http://dx.doi.org/10.1038/ng.3434">http://dx.doi.org/10.1038/ng.3434</a>                                                                                             |
| Total Cholesterol            | TC       | 100184      | <a href="https://www.nature.com/articles/nature09270">https://www.nature.com/articles/nature09270</a>                                                                         |
| Triglycerides                | TG       | 96598       | <a href="https://www.nature.com/articles/nature09270">https://www.nature.com/articles/nature09270</a>                                                                         |
| Type-II Diabetes             | T2D      | 159208      | <a href="http://diabetes.diabetesjournals.org/cgi/pmidlookup?view=long&amp;pmid=28566273">http://diabetes.diabetesjournals.org/cgi/pmidlookup?view=long&amp;pmid=28566273</a> |
| Ulcerative Colitis           | UC       | 45975       | <a href="https://www.nature.com/articles/ng.3760">https://www.nature.com/articles/ng.3760</a>                                                                                 |
| Monocyte count               | Monocyte | 131305      | <a href="https://www.sciencedirect.com/science/article/pii/S0092867416314635?via%3Dihub">https://www.sciencedirect.com/science/article/pii/S0092867416314635?via%3Dihub</a>   |

**S Table 10A: Sensitivity analysis of local gene mapping using different clumping parameters**

| Local correlated trait      | Gene mapped for trait: frequency (rank) |                         | Gene mapped for IPF     |                        | Manuscript mapped gene             |
|-----------------------------|-----------------------------------------|-------------------------|-------------------------|------------------------|------------------------------------|
| Hip circumference           | <i>ANAPC10</i> : 99 (1)                 | <i>HHIP</i> : 30 (4)    | <i>ANAPC10</i> : 60 (1) | <i>HHIP</i> : 26 (2)   | <i>ANAPC10, HHIP</i>               |
| Lung cancer                 | <i>POT1</i> : 12 (1)                    |                         | <i>POT1</i> : 70 (1)    |                        | <i>POT1</i>                        |
| Fibroblastic disorders      | <i>RSPO2</i> : 203 (1)                  | <i>EIF3E</i> : 196 (2)  | <i>EIF3E</i> : 34(1)    | <i>RSPO2</i> : 28(2)   | <i>RSPO2, EIF3E</i>                |
| Palmar fascial fibromatosis | <i>RSPO2</i> : 175 (2)                  | <i>EIF3E</i> : 197 (1)  |                         |                        |                                    |
| Body mass index             | <i>RMST</i> : 150 (1)                   |                         | * <i>RMST</i> : 9 (1)   |                        | <i>RMST</i>                        |
| Hip circumference           | <i>RMST</i> : 186 (1)                   |                         |                         |                        |                                    |
| Prostate cancer             | <i>ZBTB7C</i> : 45 (1)                  | * <i>SMAD2</i> : 27 (2) | <i>ZBTB7C</i> : 36(1)   | * <i>SMAD2</i> : 18(2) | <i>ZBTB7C, SMAD2</i>               |
| Body fat percentage         | <i>ZBTB46</i> : 130 (1)                 | <i>RTEL1</i> : 89 (2)   | <i>HELZ2</i> : 87 (3)   | <i>STMN3</i> : 51 (4)  | <i>HELZ2, STMN3, RTEL1, ZBTB46</i> |
| Whole-body fat mass         | <i>ZBTB46</i> : 117 (1)                 | <i>RTEL1</i> : 66 (2)   | <i>HELZ2</i> : 39 (3)   | <i>STMN3</i> : 28 (4)  |                                    |

\*The lead SNP is not direct matched to any gene but locates within 100kb of the gene

**S Table 10B: Sensitivity analysis of local gene mapping using GWASs colocalization**

| Trait                       | Posterior probability (PPA) | Mostly likely common causal SNP for both GWASs | Gene mapped to SNP                                                                                 | Manuscript mapped gene             |
|-----------------------------|-----------------------------|------------------------------------------------|----------------------------------------------------------------------------------------------------|------------------------------------|
| Hip circumference           | 0.6429                      | rs4240326                                      | <i>ANAPC10</i>                                                                                     | <i>ANAPC10, HHIP</i>               |
| Lung cancer                 | 0.007362                    | rs727505                                       | <i>POT1, C7orf77</i>                                                                               | <i>POT1</i>                        |
| Prostate cancer             | 0.008898                    | rs10241173                                     |                                                                                                    |                                    |
| Fibroblastic disorders      | 0.2380                      | rs416611 (109124593)                           | located in the middle of <i>RSPO2</i> (108911544-109095848) and <i>EIF3E</i> (109213445-109260946) | <i>RSPO2, EIF3E</i>                |
| Palmar fascial fibromatosis | 0.1991                      |                                                |                                                                                                    |                                    |
| Hip circumference           | 0.01850                     | rs10777859                                     | <i>RMST</i>                                                                                        | <i>RMST</i>                        |
| Prostate cancer             | 0.005649                    | rs2653659                                      | <i>SMAD2</i>                                                                                       | <i>ZBTB7C, SMAD2</i>               |
| Body fat percentage         | 0.4289                      | rs1056441                                      | <i>RTEL1-TNFRSF6B, ZBTB46</i>                                                                      | <i>HELZ2, STMN3, RTEL1, ZBTB46</i> |
| Whole-body fat mass         | 0.4204                      |                                                |                                                                                                    |                                    |

## References

- [1] Grossberger, R., et al., Characterization of the DOC1/APC10 subunit of the yeast and the human anaphase-promoting complex. *Journal of Biological Chemistry*, 1999. **274**(20): p. 14500-14507.
- [2] Kathiriyai, J.J., et al., Human alveolar Type 2 epithelium transdifferentiates into metaplastic KRT5+ basal cells during alveolar repair. *bioRxiv*, 2020.
- [3] Wei, H., et al., Hhpi inhibits proliferation and promotes differentiation of adipocytes through suppressing hedgehog signaling pathway. *Biochemical and biophysical research communications*, 2019. **514**(1): p. 148-156.
- [4] Zhang, M., et al., Targeting the Wnt signaling pathway through R-spondin 3 identifies an anti-fibrosis treatment strategy for multiple organs. *PLoS one*, 2020. **15**(3): p. e0229445.
- [5] Munguía-Reyes, A., et al., R-spondin-2 is upregulated in idiopathic pulmonary fibrosis and affects fibroblast behavior. *American journal of respiratory cell and molecular biology*, 2018. **59**(1): p. 65-76.
- [6] Jackson, S.R., et al., R-spondin 2 mediates neutrophil egress into the alveolar space through increased lung permeability. *BMC Research Notes*, 2020. **13**(1): p. 1-7.
- [7] Sadato, D., et al., Eukaryotic translation initiation factor 3 (eIF3) subunit e is essential for embryonic development and cell proliferation. *FEBS open bio*, 2018. **8**(8): p. 1188-1201.
- [8] Cai, X., et al., The Possible Role of Eukaryotic Translation Initiation Factor 3 Subunit e (eIF3e) in the Epithelial–Mesenchymal Transition in Adenomyosis. *Reproductive Sciences*, 2019. **26**(3): p. 377-385.
- [9] Scherag, A., et al., Two new Loci for body-weight regulation identified in a joint analysis of genome-wide association studies for early-onset extreme obesity in French and German study groups. *PLoS Genet*, 2010. **6**(4): p. e1000916.
- [10] Jeon, B.-N., et al., KR-POK interacts with p53 and represses its ability to activate transcription of p21WAF1/CDKN1A. *Cancer research*, 2012. **72**(5): p. 1137-1148.
- [11] Yang, J., R. Wahdan-Alaswad, and D. Danielpour, Critical role of smad2 in tumor suppression and transforming growth factor-β-induced apoptosis of prostate epithelial cells. *Cancer research*, 2009. **69**(6): p. 2185-2190.
- [12] Brodin, G., et al., Increased smad expression and activation are associated with apoptosis in normal and malignant prostate after castration. *Cancer research*, 1999. **59**(11): p. 2731-2738.
- [13] Kolosova, I., D. Nethery, and J.A. Kern, Role of Smad2/3 and p38 MAP kinase in TGF-β1-induced epithelial–mesenchymal transition of pulmonary epithelial cells. *Journal of cellular physiology*, 2011. **226**(5): p. 1248-1254.
- [14] Walton, K.L., K.E. Johnson, and C.A. Harrison, Targeting TGF-β mediated SMAD signaling for the prevention of fibrosis. *Frontiers in pharmacology*, 2017. **8**: p. 461.
- [15] Katano-Toki, A., et al., THRAP3 interacts with HELZ2 and plays a novel role in adipocyte differentiation. *Molecular endocrinology*, 2013. **27**(5): p. 769-780.
- [16] Nair, S., et al., Nicotine-mediated invasion and migration of non-small cell lung carcinoma cells by modulating STMN3 and GSPT1 genes in an ID1-dependent manner. *Molecular cancer*, 2014. **13**(1): p. 1-16.
- [17] Snetelaar, R., et al., Short telomere length in IPF lung associates with fibrotic lesions and predicts survival. *PLoS one*, 2017. **12**(12): p. e0189467.
- [18] McDonough, J.E., et al., A role for telomere length and chromosomal damage in idiopathic pulmonary fibrosis. *Respiratory research*, 2018. **19**(1): p. 132.
- [19] Arias-Salgado, E.G., et al., Genetic analyses of aplastic anemia and idiopathic pulmonary fibrosis patients with short telomeres, possible implication of DNA-repair genes. *Orphanet journal of rare diseases*, 2019. **14**(1): p. 82.
- [20] Meredith, M.M., et al., Expression of the zinc finger transcription factor zDC (Zbtb46, Btbd4) defines the classical dendritic cell lineage. *Journal of Experimental Medicine*, 2012. **209**(6): p. 1153-1165.
- [21] Chronic exposure to cigarette smoke leads to activation of p21 (RAC1)-activated kinase 6 (PAK6) in non-small cell lung cancer cells. *Oncotarget*, 2016. **7**(38): p. 61229.
- [22] Jeon, B.-N., et al., KR-POK interacts with p53 and represses its ability to activate transcription of p21WAF1/CDKN1A. *Cancer research*, 2012. **72**(5): p. 1137-1148.
- [23] Katano-Toki, A., et al., THRAP3 interacts with HELZ2 and plays a novel role in adipocyte differentiation. *Molecular endocrinology*, 2013. **27**(5): p. 769-780.
- [24] Otsubo, K., et al., Paired genetic analysis by next-generation sequencing of lung cancer and associated idiopathic pulmonary fibrosis. *Cancer science*, 2020. **111**(7): p. 2482.
- [25] Bläsius, F.M., et al., Loss of cadherin related family member 5 (CDHR5) expression in clear cell renal cell carcinoma is a prognostic marker of disease progression. *Oncotarget*, 2017. **8**(43): p. 75076.
- [26] Zheng, L., et al., Carbon Monoxide Modulates α-Smooth Muscle Actin and Small Proline Rich-1a Expression in Fibrosis. *American journal of respiratory cell and molecular biology*, 2009. **41**(1): p. 85-92.
- [27] Hübner, A., et al., Functional cooperation of the proapoptotic Bcl2 family proteins Bmf and Bim in vivo. *Molecular and cellular biology*, 2010. **30**(1): p. 98-105.
- [28] Ahmed, D., et al., Quantitative validation of GJC1 promoter hypermethylation in benign and malignant colorectal tumors. *Endocrine-related cancer*, 2011. **18**(6): p. C31-C34.
- [29] Vendamuri, S., F. Trapasso, and G.A. Calin, ARLTS1—a novel tumor suppressor gene. *Cancer letters*, 2008. **264**(1): p. 11-20.
- [30] Snetelaar, R., et al., Short telomere length in IPF lung associates with fibrotic lesions and predicts survival. *PLoS one*, 2017. **12**(12): p. e0189467.
- [31] McDonough, J.E., et al., A role for telomere length and chromosomal damage in idiopathic pulmonary fibrosis. *Respiratory research*, 2018. **19**(1): p. 132.
- [32] Arias-Salgado, E.G., et al., Genetic analyses of aplastic anemia and idiopathic pulmonary fibrosis patients with short telomeres, possible implication of DNA-repair genes. *Orphanet journal of rare diseases*, 2019. **14**(1): p. 82.
- [33] Ishigaki, K., et al., Large-scale genome-wide association study in a Japanese population identifies novel susceptibility loci across different diseases. *Nature Genetics*, 2020: p. 1-11.
- [34] Lin, X., et al., Down-regulation of telomere maintenance genes TRF1, TRF2 and POT1 in lung cancer. 2005, AACR.
- [35] Giambartolomei, Claudia et al. "A Bayesian framework for multiple trait colocalization from summary association statistics." *Bioinformatics (Oxford, England)* vol. 34,15 (2018): 2538-2545.
